# Supplementary material for: Characterization and miRNA Profiling of Extracellular Vesicles from Human Osteoarthritic Subchondral Bone Multipotential Stromal Cells (MSCs)
Source: Stem Cells Int. 2021 Oct 9;2021:7232773. doi: 10.1155/2021/7232773 (PMC8520657; doi:10.1155/2021/7232773)
Supplement: Supplementary 3 — Supplementary Data 1: analysis of miRNAs in OA-EVs compared with H-EVs, showing the differential expression, with and without FDR correction, fold change (FC) and p value. [file 7232773.f3.txt]

Probe Name	EV1 : H	EV2 : H	EV3 : H	EV4 : H	EV1 : OA	EV2 : OA	EV3 : OA	EV4 : OA	H	OA	P.Adjust	P.val	EV H vs. EV OA
hsa-miR-27b-3p	566,8	523,04	466,6	529,77	20	20	20	20	521,5525	20	0,002470641	4,19E-06	26,01
hsa-miR-99b-5p	244,04	200,79	246,7	309,97	20	20	20	20	250,375	20	0,01777857	9,66E-05	12,37
hsa-miR-376a-3p	342,44	438,26	376,06	636,85	20	20	20	20	448,4025	20	0,017778571	0,000190775	21,77
hsa-miR-125a-5p	362,12	254,83	419,48	405,78	20	20	20	20	360,5525	20	0,017778571	0,000136974	2,08
hsa-miR-148a-3p	224,36	320,76	262,41	405,78	20	20	20	20	303,3275	20	0,017778571	0,000235746	1
hsa-miR-127-3p	303,08	211,2	246,7	377,6	20	20	20	20	284,645	20	0,017778571	0,000241065	1,2
hsa-miR-376c-3p	161,38	252,35	231,92	214,16	20	20	20	20	214,9525	20	0,017778571	0,000152069	10,6
hsa-miR-361-5p	230,26	235	179,25	174,71	20	20	20	20	204,805	20	0,017778571	8,78E-05	1,18
hsa-let-7c-5p	499,88	252,84	340,02	411,42	20	20	20	20	376,04	20	0,01792906	0,000273494	18,23
hsa-let-7g-5p	340,47	789,27	424,1	710,12	20	20	20	20	565,99	20	0,020760435	0,000506425	26,67
hsa-miR-15a-5p	322,76	569,15	385,3	851,01	20	20	20	20	532,055	20	0,020760435	0,00065938	1,62
hsa-miR-181a-5p	305,05	347,54	334,48	670,67	20	20	20	20	414,435	20	0,020760435	0,000484919	19,63
hsa-let-7f-5p	210,58	487,34	348,34	264,89	20	20	20	20	327,7875	20	0,020760435	0,000619278	15,6
hsa-miR-19b-3p	210,58	447,68	262,41	377,6	20	20	20	20	324,5675	20	0,020760435	0,00052734	15,54
hsa-miR-25-3p	238,13	382,74	192,19	360,69	20	20	20	20	293,4375	20	0,020760435	0,000534066	14,1
hsa-miR-423-5p	275,53	356,46	192,19	169,08	20	20	20	20	248,315	20	0,020760435	0,000703744	11,88
hsa-miR-337-5p	118,08	138,82	112,72	197,26	20	20	20	20	141,72	20	0,020760435	0,000613099	6,91
hsa-miR-409-3p	90,53	111,05	120,12	152,17	20	20	20	20	118,4675	20	0,020760435	0,000491967	5,82
hsa-miR-93-5p	263,72	528	222,68	326,88	20	20	20	20	335,32	20	0,02076044	0,000672245	1
hsa-miR-98-5p	206,64	237,47	131,2	270,52	20	20	20	20	211,4575	20	0,02076044	0,000675592	10,21
hsa-miR-424-5p	385,74	249,87	313,23	715,75	20	20	20	20	416,1475	20	0,02247968	0,000970044	19,17
hsa-miR-1260a	452,65	298,45	603,35	219,8	20	20	20	20	393,5625	20	0,02247968	0,000975094	17,7
hsa-let-7e-5p	299,14	180,96	271,65	473,41	20	20	20	20	306,29	20	0,02247968	0,000874243	14,44
hsa-miR-382-5p	165,32	191,86	158	332,52	20	20	20	20	211,925	20	0,02247968	0,000876755	10,1
hsa-miR-136-5p	145,64	154,68	182,95	304,34	20	20	20	20	196,9025	20	0,02247968	0,000899165	1
hsa-miR-495-3p	165,32	130,39	96,09	191,62	20	20	20	20	145,855	20	0,02247968	0,00099063	7,06
hsa-miR-193a-5p+hsa-miR-193b-5p	135,79	88,74	145,99	185,98	20	20	20	20	139,125	20	0,024865405	0,001137908	6,72
hsa-miR-214-3p	456,59	200,29	597,81	597,4	20	20	20	20	463,0225	20	0,025462858	0,001304188	2,45
hsa-miR-20a-5p+hsa-miR-20b-5p	208,61	542,37	334,48	197,26	20	20	20	20	320,68	20	0,025462858	0,001453485	14,7
hsa-miR-222-3p	224,36	229,05	235,61	586,13	20	20	20	20	318,7875	20	0,025462858	0,001445325	2,77
hsa-miR-24-3p	188,93	378,27	138,6	236,71	20	20	20	20	235,6275	20	0,025462858	0,001467351	11
hsa-miR-10a-5p	196,8	117,99	148,76	276,16	20	20	20	20	184,9275	20	0,025462858	0,001291947	3,98
hsa-miR-23b-3p	139,73	125,43	130,28	264,89	20	20	20	20	165,0825	20	0,025462858	0,001344757	7,84
hsa-miR-342-3p	80,69	125,43	81,31	135,26	20	20	20	20	105,6725	20	0,025462858	0,001289957	5,14
hsa-miR-191-5p	371,96	1082,76	303,06	766,48	20	20	20	20	631,065	20	0,02654151	0,001574496	2,83
hsa-miR-106a-5p+hsa-miR-17-5p	135,79	374,8	213,44	174,71	20	20	20	20	224,685	20	0,026639368	0,001670604	1,76
hsa-miR-99a-5p	273,56	129,4	170,01	332,52	20	20	20	20	226,3725	20	0,02663937	0,001644807	10,58
hsa-miR-130a-3p	509,72	1687,61	470,3	411,42	20	20	20	20	769,7625	20	0,02787709	0,001795474	2,07
hsa-miR-28-5p	202,71	112,04	97,02	197,26	20	20	20	20	152,2575	20	0,028829699	0,001905692	7,22
hsa-miR-337-3p	120,05	103,62	116,42	236,71	20	20	20	20	144,2	20	0,029288926	0,00198569	6,8
hsa-miR-450a-5p	283,4	110,06	255,02	309,97	20	20	20	20	239,6125	20	0,029677847	0,002062359	11,14
hsa-miR-485-3p	72,82	84,78	63,75	129,62	20	20	20	20	87,7425	20	0,036302685	0,002584259	4,23
hsa-miR-574-3p	98,4	83,29	91,47	185,98	20	20	20	20	114,785	20	0,03631604	0,002646762	5,43
hsa-miR-107	96,43	275,15	123,81	146,53	20	20	20	20	160,48	20	0,038812248	0,002938841	10,44
hsa-miR-379-5p	179,09	79,32	104,41	185,98	20	20	20	20	137,2	20	0,038812248	0,002965387	6,44
hsa-miR-574-5p	234,2	85,77	160,77	112,72	20	20	20	20	148,365	20	0,03881225	0,00302604	6,91
hsa-miR-575	303,08	108,08	124,74	326,88	20	20	20	20	215,695	20	0,05525532	0,004401695	9,56
hsa-miR-21-5p	4062,04	3356,87	5313,75	5314,61	2003,15	1863,9	1944,61	2869,27	4511,8175	2170,2325	0,05601178	0,004651826	1,85
hsa-miR-320e	340,47	84,28	221,75	214,16	20	20	20	20	215,165	20	0,05601178	0,004569647	1,18
hsa-miR-199b-5p	161,38	120,47	227,3	535,41	20	20	20	20	261,14	20	0,059418862	0,005035497	11,03
hsa-miR-140-5p	181,06	85,77	80,39	214,16	20	20	20	20	140,345	20	0,059897586	0,005177588	2,09
hsa-miR-34a-5p	616	238,96	325,24	2000,73	20	20	20	20	795,2325	20	0,065860746	0,005804676	27,82
hsa-miR-3195	253,88	70,4	253,17	169,08	20	20	20	20	186,6325	20	0,066297875	0,005955572	8,32
hsa-miR-377-3p	86,59	93,7	71,15	214,16	20	20	20	20	116,4	20	0,069965947	0,006403663	5,27
hsa-miR-656-3p	145,64	53,54	67,45	112,72	20	20	20	20	94,8375	20	0,08144519	0,007592348	4,39
hsa-miR-543	62,98	70,9	45,27	118,35	20	20	20	20	74,375	20	0,08595482	0,008158423	3,5
hsa-miR-503-5p	183,03	64,45	153,38	343,79	20	20	20	20	186,1625	20	0,09670923	0,009343095	7,9
hsa-miR-612	204,68	53,05	79,46	118,35	20	20	20	20	113,885	20	0,11419381	0,01122583	5,03
hsa-miR-1290	261,75	55,03	106,26	152,17	20	20	20	20	143,8025	20	0,114392507	0,01143925	1,88
hsa-miR-132-3p	70,85	56,02	76,69	191,62	20	20	20	20	98,795	20	0,118691917	0,01207036	4,37
hsa-miR-642a-3p	159,41	41,15	116,42	129,62	20	20	20	20	111,65	20	0,12572447	0,01299863	4,99
hsa-miR-6721-5p	131,86	33,71	65,6	163,44	1413,99	1112,33	1274,05	544,17	98,6525	1086,135	0,13895259	0,0146018	-12,3
hsa-miR-873-3p	198,77	43,13	94,24	129,62	20	20	20	20	116,44	20	0,14121445	0,01519546	5,06
hsa-miR-196a-5p	96,43	51,06	68,37	208,53	20	20	20	20	106,0975	20	0,141214452	0,01531818	4,58
hsa-miR-31-5p	59,04	35,2	91,47	118,35	20	20	20	20	76,015	20	0,170074215	0,01873699	1,76
hsa-miR-137	72,82	37,18	55,44	129,62	20	20	20	20	73,765	20	0,174906034	0,01956576	2,14
hsa-miR-598-3p	110,21	34,7	59,13	112,72	20	20	20	20	79,19	20	0,18061167	0,02051014	3,55
hsa-miR-186-5p	53,14	42,14	45,27	135,26	20	20	20	20	68,9525	20	0,226078852	0,02605655	3,04
hsa-miR-23a-3p	1511,46	2140,24	1338,83	2462,87	1178,33	1352,83	1139,94	1459,37	1863,35	1282,6175	0,229277468	0,02681381	1,42
hsa-miR-188-5p	102,34	29,25	46,2	118,35	20	20	20	20	74,035	20	0,334747253	0,03971578	3,18
hsa-miR-4516	444,78	32,72	174,63	112,72	20	20	20	20	191,2125	20	0,338780697	0,04076852	6,5
hsa-miR-199a-3p+hsa-miR-199b-3p	2920,57	2974,13	2515,97	5545,68	2356,65	2044,27	1978,13	2745,6	3489,0875	2281,1625	0,33981378	0,0420076	1,47
hsa-miR-487a-3p	51,17	34,21	38,81	123,99	20	20	20	20	62,045	20	0,33981378	0,04204476	2,69
hsa-let-7i-5p	1218,22	1554,74	1762,01	3094,09	824,83	811,7	972,3	717,32	1907,265	831,5375	0,369984927	0,046404889	2,17
hsa-miR-145-5p	1052,9	737,71	2028,11	879,19	20	20	20	667,85	1174,4775	181,9625	0,384336561	0,04885634	1,71
hsa-miR-22-3p	928,92	1114,99	977,56	743,93	20	20	20	667,85	941,35	181,9625	0,398200687	0,05284948	-1,78
hsa-miR-374a-5p	425,1	717,88	282,73	529,77	20	20	20	593,64	488,87	163,41	0,398200687	0,06895353	9,9
hsa-let-7d-5p	249,94	549,81	250,4	625,58	20	601,26	20	20	418,9325	165,315	0,398200687	0,070191308	8,18
hsa-miR-143-3p	328,66	243,42	583,02	20	20	20	20	20	293,775	20	0,398200687	0,0620002	-2,21
hsa-miR-30b-5p	281,43	373,81	218,98	20	20	20	20	20	223,555	20	0,398200687	0,0595349	7,33
hsa-miR-423-3p	214,52	125,93	124,74	20	20	20	20	20	121,2975	20	0,398200687	0,06202916	4,53
hsa-miR-19a-3p	143,67	183,93	102,56	20	20	20	20	20	112,54	20	0,398200687	0,06185823	4,29
hsa-miR-340-5p	173,19	173,52	74,84	20	20	20	20	20	110,3875	20	0,398200687	0,06988155	4,09
hsa-miR-106b-5p	108,24	181,45	102,56	20	20	20	20	20	103,0625	20	0,398200687	0,063036054	1,46
hsa-miR-493-3p	114,15	79,32	173,71	20	20	20	20	20	96,795	20	0,398200687	0,06678523	3,74
hsa-miR-374b-5p	86,59	163,11	80,39	20	20	20	20	20	87,5225	20	0,398200687	0,06783986	3,45
hsa-miR-30c-5p	110,21	91,72	82,23	20	20	20	20	20	76,04	20	0,398200687	0,05934911	3,19
hsa-miR-197-3p	110,21	81,31	86,85	20	20	20	20	20	74,5925	20	0,398200687	0,05968908	1,97
hsa-miR-30e-5p	92,5	59	60,06	20	20	20	20	20	57,89	20	0,398200687	0,06544234	2,53
hsa-miR-29c-3p	70,85	88,74	51,74	20	20	20	20	20	57,8325	20	0,398200687	0,06650574	2,53
hsa-miR-323a-3p	76,75	79,32	53,59	20	20	20	20	20	57,415	20	0,398200687	0,0633573	9,61
hsa-miR-154-5p	84,63	72,88	49,89	20	20	20	20	20	56,85	20	0,398200687	0,06687388	1,94
hsa-miR-484	74,79	58,5	49,89	20	20	20	20	20	50,795	20	0,398200687	0,06396007	2,29
hsa-miR-10b-5p	61,01	59,49	58,21	20	20	20	20	20	49,6775	20	0,398200687	0,0577542	7,41
hsa-miR-196b-5p	70,85	52,06	55,44	20	20	20	20	20	49,5875	20	0,398200687	0,06184258	2,25
hsa-miR-324-5p	61,01	56,02	40,65	20	20	20	20	20	44,42	20	0,398200687	0,06696258	1,08
hsa-miR-193b-3p	53,14	51,56	40,65	20	20	20	20	20	41,3375	20	0,398200687	0,06280357	1,93
hsa-miR-28-3p	51,17	44,12	48,97	20	20	20	20	20	41,065	20	0,398200687	0,05905926	1,93
hsa-miR-376b-3p	39,36	45,12	54,51	20	20	20	20	20	39,7475	20	0,398200687	0,06477886	1,87
hsa-miR-431-5p	49,2	46,6	39,73	20	20	20	20	20	38,8825	20	0,398200687	0,06112039	1,84
hsa-miR-27a-3p	43,3	34,7	50,82	20	20	20	20	20	37,205	20	0,398200687	0,06957821	1,76
hsa-miR-494-3p	1946,39	328,7	838,96	20	20	20	20	20	783,5125	20	0,39820069	0,0682547	16,09
hsa-miR-590-5p	179,09	109,57	97,94	20	20	20	20	20	101,65	20	0,39820069	0,06333844	3,94
hsa-miR-92a-3p	102,34	102,62	114,57	20	20	20	20	20	84,8825	20	0,39820069	0,05794182	3,5
hsa-miR-32-5p	102,34	171,04	69,3	20	20	20	20	20	90,67	20	0,399565931	0,07110919	2,11
hsa-miR-4454+hsa-miR-7975	86922,47	70613,7	179997,55	17138,64	10801,32	11634,32	19010,19	21989,51	88668,09	15858,835	0,400505745	0,08517779	4,36
hsa-miR-125b-5p	8846,34	4915,57	7849,12	13779,67	5577,41	5381,25	5330,9	7692,62	8847,675	5995,545	0,400505745	0,10775038	2,51
hsa-let-7a-5p	4067,94	4270,08	3907,47	9366,79	20	2435,09	972,3	4328,64	5403,07	1939,0075	0,400505745	0,169430401	7,46
hsa-miR-4286	4687,87	2812,51	8909,84	1758,39	1217,6	721,51	2279,88	1978,81	4542,1525	1549,45	0,400505745	0,07506821	2,69
hsa-let-7b-5p	2153,04	1731,73	2246,17	4835,57	1767,49	1743,65	2279,88	2226,16	2741,6275	2004,295	0,400505745	0,290769057	1,27
hsa-miR-16-5p	1922,78	3585,91	1766,63	1358,24	20	1052,2	1005,83	939,93	2158,39	754,49	0,400505745	0,18451	5,37
hsa-miR-142-3p	373,93	5273,02	603,35	123,99	1453,27	2705,66	1072,89	840,99	1593,5725	1518,2025	0,400505745	0,2503851	1,99
hsa-miR-15b-5p	584,51	1499,21	581,18	1476,59	785,55	962,01	20	643,11	1035,3725	602,6675	0,400505745	0,2653105	24,77
hsa-miR-199a-5p	635,68	591,46	851,9	1628,76	20	721,51	938,78	1038,87	926,95	679,79	0,400505745	0,3725406	2,47
hsa-miR-26a-5p	519,56	1623,65	695,75	242,34	903,38	20	20	20	770,325	240,845	0,400505745	0,1062395	11,84
hsa-miR-365a-3p+hsa-miR-365b-3p	419,19	251,85	428,72	574,86	20	601,26	20	20	418,655	165,315	0,400505745	0,1230234	8,58
hsa-miR-146a-5p	131,86	1094,66	167,24	20	20	20	20	20	353,44	20	0,400505745	0,09189272	1,12
hsa-miR-1246	680,94	98,66	247,62	20	20	20	20	20	261,805	20	0,400505745	0,083931065	1
hsa-miR-451a	78,72	689,12	68,37	20	20	20	20	20	214,0525	20	0,400505745	0,1282621	4,64
hsa-miR-4488	273,56	35,2	248,55	20	20	20	20	20	144,3275	20	0,400505745	0,1233256	4,16
hsa-miR-4284	49,2	20	67,45	355,06	20	20	20	20	122,9275	20	0,400505745	0,1293315	3,48
hsa-miR-26b-5p	118,08	235,99	74,84	20	20	20	20	20	112,2275	20	0,400505745	0,07547396	4,02
hsa-miR-149-5p	226,32	55,53	98,86	20	20	20	20	20	100,1775	20	0,400505745	0,089735	2,52
hsa-miR-1234-3p	173,19	37,18	161,69	20	20	20	20	20	98,015	20	0,400505745	0,109107549	1,2
hsa-miR-1268a	163,35	53,05	100,71	20	20	20	20	20	84,2775	20	0,400505745	0,08143247	1,2
hsa-miR-139-3p	186,96	47,1	78,54	20	20	20	20	20	83,15	20	0,400505745	0,09743732	3,32
hsa-miR-151a-3p	66,91	174,02	70,22	20	20	20	20	20	82,7875	20	0,400505745	0,07994549	2,66
hsa-miR-302d-3p	210,58	34,21	59,13	20	20	20	20	20	80,98	20	0,400505745	0,1435245	2,7
hsa-miR-2682-5p	173,19	39,17	66,53	20	20	20	20	20	74,7225	20	0,400505745	0,1137765	2,74
hsa-miR-371a-5p	179,09	38,67	54,51	20	20	20	20	20	73,0675	20	0,400505745	0,1268517	2,62
hsa-miR-3144-3p	204,68	23,8	37,88	20	20	20	20	20	71,59	20	0,400505745	0,2361061	1,93
hsa-miR-34c-3p	183,03	32,72	49,89	20	20	20	20	20	71,41	20	0,400505745	0,1525638	2,47
hsa-miR-381-3p	145,64	53,05	65,6	20	20	20	20	20	71,0725	20	0,400505745	0,08470126	2,82
hsa-miR-150-5p	53,14	163,11	46,2	20	20	20	20	20	70,6125	20	0,400505745	0,1081027	3,53
hsa-miR-335-5p	96,43	128,4	36,96	20	20	20	20	20	70,4475	20	0,400505745	0,09989838	2,75
hsa-miR-148b-3p	45,26	170,55	41,58	20	20	20	20	20	69,3475	20	0,400505745	0,1304144	14,79
hsa-miR-1915-3p	123,99	50,07	83,16	20	20	20	20	20	69,305	20	0,400505745	0,0772555	27,65
hsa-miR-1285-5p	92,5	22,81	25,87	135,26	20	20	20	20	69,11	20	0,400505745	0,1222376	1,69
hsa-miR-212-3p	173,19	33,22	49,89	20	20	20	20	20	69,075	20	0,400505745	0,1473922	1,38
hsa-miR-185-5p	70,85	139,81	45,27	20	20	20	20	20	68,9825	20	0,400505745	0,09020266	2,74
hsa-miR-192-5p	155,48	33,71	64,68	20	20	20	20	20	68,4675	20	0,400505745	0,1244126	2,55
hsa-miR-450b-3p	169,25	31,73	50,82	20	20	20	20	20	67,95	20	0,400505745	0,1503072	2,42
hsa-miR-122-5p	179,09	52,06	20	20	20	20	20	20	67,7875	20	0,400505745	0,227129087	1,68
hsa-miR-125a-3p	155,48	37,18	54,51	20	20	20	20	20	66,7925	20	0,400505745	0,122515683	2,44
hsa-miR-138-5p	135,79	24,29	79,46	20	20	20	20	20	64,885	20	0,400505745	0,1556987	9,41
hsa-miR-1257	145,64	33,22	58,21	20	20	20	20	20	64,2675	20	0,400505745	0,127351257	1,94
hsa-miR-4531	141,7	28,75	57,29	20	20	661,38	737,61	519,44	61,935	484,6075	0,400505745	0,2549203	-5,74
hsa-miR-217	147,6	35,2	43,43	20	20	20	20	20	61,5575	20	0,400505745	0,1416959	2,3
hsa-miR-378i	133,83	39,66	52,67	20	20	20	20	20	61,54	20	0,400505745	0,1093995	2,43
hsa-miR-216b-5p	129,89	36,69	57,29	20	20	20	20	20	60,9675	20	0,400505745	0,1108399	2,42
hsa-miR-193a-3p	139,73	33,71	49,89	20	20	20	20	20	60,8325	20	0,400505745	0,1322398	2,33
hsa-miR-1972	165,32	23,3	31,41	20	20	20	20	20	60,0075	20	0,400505745	0,2573696	3,14
hsa-miR-4755-5p	147,6	26,28	39,73	20	20	20	20	20	58,4025	20	0,400505745	0,1934863	2,09
hsa-miR-488-3p	147,6	21,81	39,73	20	20	20	20	20	57,285	20	0,400505745	0,2300269	2
hsa-miR-3144-5p	143,67	23,3	40,65	20	20	20	20	20	56,905	20	0,400505745	0,2118184	2,19
hsa-miR-3934-5p	139,73	32,23	34,19	20	20	20	20	20	56,5375	20	0,400505745	0,1759102	2,09
hsa-miR-1180-3p	88,56	37,68	79,46	20	20	20	20	20	56,425	20	0,400505745	0,08662244	8,79
hsa-miR-378e	20	20	163,54	20	20	20	20	20	55,885	20	0,400505745	0,3910022	1,69
hsa-miR-129-2-3p	127,92	26,28	48,05	20	20	20	20	20	55,5625	20	0,400505745	0,1651007	2,12
hsa-miR-302c-3p	133,83	30,24	37,88	20	20	20	20	20	55,4875	20	0,400505745	0,1691891	2,09
hsa-miR-449c-5p	139,73	24,79	36,96	20	20	20	20	20	55,37	20	0,400505745	0,2100053	2
hsa-miR-4451	129,89	25,28	46,2	20	20	20	20	20	55,3425	20	0,400505745	0,1762949	2,09
hsa-miR-3161	88,56	41,64	71,15	20	20	20	20	20	55,3375	20	0,400505745	0,07803822	2,39
hsa-miR-320a	123,99	35,7	41,58	20	20	20	20	20	55,3175	20	0,400505745	0,1317898	3,51
hsa-miR-1202	139,73	26,28	35,11	20	20	20	20	20	55,28	20	0,400505745	0,205978717	1,87
hsa-miR-1298-5p	137,76	25,28	37,88	20	20	20	20	20	55,23	20	0,400505745	0,2020156	1,32
hsa-miR-135b-5p	120,05	25,28	55,44	20	20	20	20	20	55,1925	20	0,400505745	0,1580155	1,23
hsa-miR-3180	129,89	22,31	46,2	20	20	20	20	20	54,6	20	0,400505745	0,200687	2,02
hsa-miR-1258	127,92	28,26	41,58	20	20	20	20	20	54,44	20	0,400505745	0,166283088	1,36
hsa-miR-1261	129,89	27,27	39,73	20	20	20	20	20	54,2225	20	0,400505745	0,178325225	2,06
hsa-miR-1236-3p	135,79	20	40,65	20	20	20	20	20	54,11	20	0,400505745	0,242348803	1
hsa-miR-1293	139,73	22,31	33,26	20	20	20	20	20	53,825	20	0,400505745	0,2482018	1,02
hsa-miR-30d-5p	64,95	104,11	25,87	20	20	20	20	20	53,7325	20	0,400505745	0,1401987	2,16
hsa-miR-433-5p	120,05	24,29	48,97	20	20	20	20	20	53,3275	20	0,400505745	0,173824	2,06
hsa-miR-141-3p	127,92	27,76	35,11	20	20	20	20	20	52,6975	20	0,400505745	0,1897448	6,39
hsa-miR-1269a	116,11	30,24	43,43	20	20	20	20	20	52,445	20	0,400505745	0,144617426	3,23
hsa-miR-140-3p	118,08	34,7	36,96	20	20	20	20	20	52,435	20	0,400505745	0,1434757	1,9
hsa-miR-144-3p	20	143,28	24,02	20	20	20	20	20	51,825	20	0,400505745	0,3430555	8,74
hsa-miR-325	106,27	28,26	52,67	20	20	20	20	20	51,8	20	0,400505745	0,1353061	2,04
hsa-miR-483-3p	106,27	31,73	48,97	20	20	20	20	20	51,7425	20	0,400505745	0,1228962	2,13
hsa-miR-339-3p	129,89	21,81	35,11	20	20	20	20	20	51,7025	20	0,400505745	0,2405428	1,88
hsa-miR-1203	118,08	22,31	46,2	20	20	20	20	20	51,6475	20	0,400505745	0,195197681	1,78
hsa-miR-1307-3p	112,18	31,23	41,58	20	20	20	20	20	51,2475	20	0,400505745	0,1413307	1
hsa-miR-4532	114,15	20	49,89	20	20	20	20	20	51,01	20	0,400505745	0,2111554	1,94
hsa-miR-1307-5p	100,37	26,77	56,36	20	20	20	20	20	50,875	20	0,400505745	0,1374184	1,58
hsa-miR-3928-3p	125,95	22,31	33,26	20	20	20	20	20	50,38	20	0,400505745	0,2421576	1,85
hsa-miR-3180-3p	127,92	20	33,26	20	20	20	20	20	50,295	20	0,400505745	0,2702043	1,81
hsa-miR-1226-3p	114,15	25,78	40,65	20	20	20	20	20	50,145	20	0,400505745	0,176694124	1,97
hsa-miR-1206	114,15	30,24	35,11	20	20	20	20	20	49,875	20	0,400505745	0,166494392	1,97
hsa-miR-1255a	43,3	20	23,1	112,72	20	20	20	20	49,78	20	0,400505745	0,191326638	1,38
hsa-miR-216a-5p	112,18	23,8	42,5	20	20	20	20	20	49,62	20	0,400505745	0,1866367	1,94
hsa-miR-147a	112,18	24,29	40,65	20	20	20	20	20	49,28	20	0,400505745	0,1872789	1,07
hsa-miR-301a-3p	57,07	80,31	39,73	20	20	20	20	20	49,2775	20	0,400505745	0,07854486	2,18
hsa-miR-3136-5p	104,31	21,32	49,89	20	20	20	20	20	48,88	20	0,400505745	0,1916619	1,35
hsa-miR-190a-5p	122,02	26,28	25,87	20	20	20	20	20	48,5425	20	0,400505745	0,2515145	1,79
hsa-miR-181b-2-3p	108,24	27,76	37,88	20	20	20	20	20	48,47	20	0,400505745	0,1670869	1,94
hsa-miR-1273c	112,18	20,82	40,65	20	20	20	20	20	48,4125	20	0,400505745	0,222368849	13,89
hsa-miR-1266-5p	108,24	20	42,5	20	20	20	20	20	47,685	20	0,400505745	0,225085886	1,09
hsa-miR-490-3p	112,18	26,77	29,57	20	20	20	20	20	47,13	20	0,400505745	0,214461	1,83
hsa-miR-190a-3p	116,11	20	32,34	20	20	20	20	20	47,1125	20	0,400505745	0,2704836	1,75
hsa-miR-200c-3p	100,37	29,75	37,88	20	20	20	20	20	47	20	0,400505745	0,1492463	1,94
hsa-miR-299-5p	66,91	35,2	65,6	20	20	20	20	20	46,9275	20	0,400505745	0,08267142	2,1
hsa-miR-374c-5p	76,75	25,78	63,75	20	20	20	20	20	46,57	20	0,400505745	0,1286842	1,99
hsa-miR-3182	110,21	20	36,03	20	20	20	20	20	46,56	20	0,400505745	0,2490202	1,78
hsa-miR-23c	20	20	26,8	118,35	20	20	20	20	46,2875	20	0,400505745	0,3109574	1,68
hsa-miR-302b-3p	110,21	26,28	28,64	20	20	20	20	20	46,2825	20	0,400505745	0,2231143	1,79
hsa-miR-103a-3p	110,21	20,33	34,19	20	20	20	20	20	46,1825	20	0,400505745	0,253230358	-1,13
hsa-miR-139-5p	96,43	24,79	43,43	20	20	20	20	20	46,1625	20	0,400505745	0,1654921	2,39
hsa-miR-128-3p	20	27,76	116,42	20	20	20	20	20	46,045	20	0,400505745	0,302155737	1,76
hsa-miR-302e	100,37	22,81	40,65	20	20	20	20	20	45,9575	20	0,400505745	0,1932945	1,85
hsa-miR-1193	100,37	26,28	36,96	20	20	20	20	20	45,9025	20	0,400505745	0,174284309	1,03
hsa-miR-215-5p	102,34	31,23	29,57	20	20	20	20	20	45,785	20	0,400505745	0,1783527	21,26
hsa-miR-380-3p	114,15	20,82	27,72	20	20	20	20	20	45,6725	20	0,400505745	0,2901393	1,69
hsa-miR-4521	68,88	22,31	70,22	20	20	20	20	20	45,3525	20	0,400505745	0,1556397	1,92
hsa-miR-1287-5p	90,53	23,8	46,2	20	20	20	20	20	45,1325	20	0,400505745	0,1645266	1,4
hsa-miR-372-3p	104,31	20	35,11	20	20	20	20	20	44,855	20	0,400505745	0,2501613	1,74
hsa-miR-34b-3p	100,37	20,33	37,88	20	20	20	20	20	44,645	20	0,400505745	0,2315612	1,76
hsa-miR-196a-3p	100,37	25,78	31,41	20	20	20	20	20	44,39	20	0,400505745	0,2026364	1,79
hsa-miR-1827	98,4	20	38,81	20	20	20	20	20	44,3025	20	0,400505745	0,231491	1,76
hsa-miR-4787-5p	98,4	23,8	34,19	20	20	20	20	20	44,0975	20	0,400505745	0,2051876	1,78
hsa-miR-339-5p	96,43	20	39,73	20	20	20	20	20	44,04	20	0,400505745	0,2271457	1,76
hsa-miR-1279	96,43	20,82	37,88	20	20	20	20	20	43,7825	20	0,400505745	0,222576648	1
hsa-miR-302f	104,31	20	29,57	20	20	20	20	20	43,47	20	0,400505745	0,2829844	1,67
hsa-miR-374a-3p	92,5	20	40,65	20	20	20	20	20	43,2875	20	0,400505745	0,2218006	1,75
hsa-miR-190b	96,43	20	35,11	20	20	20	20	20	42,885	20	0,400505745	0,2455885	1,71
hsa-miR-373-3p	94,47	20	36,03	20	20	20	20	20	42,625	20	0,400505745	0,24014	1,71
hsa-miR-181a-3p	72,82	32,23	45,27	20	20	20	20	20	42,58	20	0,400505745	0,09844604	1,91
hsa-miR-128-1-5p	82,66	21,81	45,27	20	20	20	20	20	42,435	20	0,400505745	0,180661504	1,06
hsa-miR-1205	96,43	20	33,26	20	20	20	20	20	42,4225	20	0,400505745	0,255061851	2
hsa-miR-152-3p	64,95	35,7	48,97	20	20	20	20	20	42,405	20	0,400505745	0,07863326	1,67
hsa-miR-331-3p	74,79	47,1	27,72	20	20	20	20	20	42,4025	20	0,400505745	0,1206281	1,87
hsa-miR-489-3p	86,59	21,32	40,65	20	20	20	20	20	42,14	20	0,400505745	0,2000616	1,75
hsa-miR-1197	84,63	24,29	38,81	20	20	20	20	20	41,9325	20	0,400505745	0,171120677	1,05
hsa-miR-299-3p	70,85	28,75	44,35	20	20	20	20	20	40,9875	20	0,400505745	0,1133537	1,83
hsa-miR-3158-3p	76,75	22,81	44,35	20	20	20	20	20	40,9775	20	0,400505745	0,1662327	1,24
hsa-miR-432-5p	62,98	42,64	36,96	20	20	20	20	20	40,645	20	0,400505745	0,07743118	1,88
hsa-miR-101-3p	86,59	21,81	33,26	20	20	20	20	20	40,415	20	0,400505745	0,222404214	1
hsa-miR-2116-5p	86,59	20	34,19	20	20	20	20	20	40,195	20	0,400505745	0,2434722	1,25
hsa-miR-371b-5p	94,47	20,82	24,95	20	20	20	20	20	40,06	20	0,400505745	0,3072551	1,57
hsa-miR-425-5p	20	90,73	28,64	20	20	20	20	20	39,8425	20	0,400505745	0,2827325	1,6
hsa-miR-181b-5p+hsa-miR-181d-5p	68,88	24,29	45,27	20	20	20	20	20	39,61	20	0,400505745	0,1426891	1,75
hsa-miR-151a-5p	20	76,35	40,65	20	20	20	20	20	39,25	20	0,400505745	0,2104389	3,18
hsa-miR-1304-5p	78,72	20	36,03	20	20	20	20	20	38,6875	20	0,400505745	0,2285595	1,36
hsa-miR-18a-5p	20	69,9	44,35	20	20	20	20	20	38,5625	20	0,400505745	0,1970214	1,67
hsa-miR-1287-3p	88,56	20	23,1	20	20	20	20	20	37,915	20	0,400505745	0,3412304	2,61
hsa-miR-1322	84,63	20	24,95	20	20	20	20	20	37,395	20	0,400505745	0,3157433	31,94
hsa-miR-219a-1-3p	68,88	20	39,73	20	20	20	20	20	37,1525	20	0,400505745	0,2067165	1,62
hsa-miR-218-5p	68,88	20	37,88	20	20	20	20	20	36,69	20	0,400505745	0,2124645	1,6
hsa-miR-2053	84,63	20	20,33	20	20	20	20	20	36,24	20	0,400505745	0,3847952	1,29
hsa-miR-183-5p	68,88	20	36,03	20	20	20	20	20	36,2275	20	0,400505745	0,2193955	1,58
hsa-miR-1306-5p	64,95	20,33	37,88	20	20	20	20	20	35,79	20	0,400505745	0,2028894	1,49
hsa-miR-30e-3p	55,11	27,76	38,81	20	20	20	20	20	35,42	20	0,400505745	0,1050565	1,65
hsa-miR-219a-2-3p	72,82	20	27,72	20	20	20	20	20	35,135	20	0,400505745	0,2774214	1,5
hsa-miR-421	41,33	23,3	55,44	20	20	20	20	20	35,0175	20	0,400505745	0,1419981	1,61
hsa-miR-4485-3p	68,88	20	28,64	20	20	20	20	20	34,38	20	0,400505745	0,2649884	1,49
hsa-miR-1286	76,75	20	20	20	20	20	20	20	34,1875	20	0,400505745	0,3910022	1,29
hsa-miR-376a-2-5p	70,85	20	25,87	20	20	20	20	20	34,18	20	0,400505745	0,2953482	1,46
hsa-miR-323b-3p	66,91	20	28,64	20	20	20	20	20	33,8875	20	0,400505745	0,2628165	2,53
hsa-miR-3613-3p	64,95	20	29,57	20	20	20	20	20	33,63	20	0,400505745	0,2525976	1
hsa-miR-1268b	62,98	20	30,49	20	20	20	20	20	33,3675	20	0,400505745	0,243036172	1,84
hsa-miR-1250-5p	72,82	20	20	20	20	20	20	20	33,205	20	0,400505745	0,391002219	6,75
hsa-miR-296-5p	43,3	27,76	41,58	20	20	20	20	20	33,16	20	0,400505745	0,08716691	1,58
hsa-miR-455-5p	57,07	20,33	35,11	20	20	20	20	20	33,1275	20	0,400505745	0,2029949	1,5
hsa-miR-1183	59,04	20	33,26	20	20	20	20	20	33,075	20	0,400505745	0,220527166	2,27
hsa-miR-1305	59,04	20	33,26	20	20	20	20	20	33,075	20	0,400505745	0,2205272	1,18
hsa-miR-329-5p	70,85	20	20,33	20	20	20	20	20	32,795	20	0,400505745	0,3839307	1,38
hsa-miR-4536-5p	62,98	20	26,8	20	20	20	20	20	32,445	20	0,400505745	0,2765475	1,43
hsa-miR-4448	47,23	20	41,58	20	20	20	20	20	32,2025	20	0,400505745	0,1837245	1,49
hsa-miR-487b-3p	45,26	42,64	20,33	20	20	20	20	20	32,0575	20	0,400505745	0,1756299	1,49
hsa-miR-378f	55,11	20	32,34	20	20	20	20	20	31,8625	20	0,400505745	0,2197372	1,45
hsa-miR-105-5p	51,17	20	35,11	20	20	20	20	20	31,57	20	0,400505745	0,201088233	1,67
hsa-miR-342-5p	47,23	20	37,88	20	20	20	20	20	31,2775	20	0,400505745	0,1885193	1,45
hsa-miR-30a-5p	51,17	23,8	29,57	20	20	20	20	20	31,135	20	0,400505745	0,162592	1,46
hsa-miR-200a-3p	47,23	20	36,96	20	20	20	20	20	31,0475	20	0,400505745	0,1903842	1,45
hsa-miR-1255b-5p	61,01	20	22,18	20	20	20	20	20	30,7975	20	0,400505745	0,343176601	-6,83
hsa-miR-1323	62,98	20	20	20	20	20	20	20	30,745	20	0,400505745	0,3910022	1,09
hsa-miR-210-3p	49,2	20	32,34	20	20	20	20	20	30,385	20	0,400505745	0,209772	2,07
hsa-miR-362-5p	45,26	20	36,03	20	20	20	20	20	30,3225	20	0,400505745	0,1899646	1,42
hsa-miR-33b-5p	57,07	20	24,02	20	20	20	20	20	30,2725	20	0,400505745	0,3067933	1,36
hsa-miR-1289	61,01	20	20	20	20	20	20	20	30,2525	20	0,400505745	0,3910022	1,5
hsa-miR-1295a	61,01	20	20	20	20	20	20	20	30,2525	20	0,400505745	0,3910022	6,18
hsa-miR-219b-3p	55,11	20	25,87	20	20	20	20	20	30,245	20	0,400505745	0,2769739	1,37
hsa-miR-486-3p	57,07	20	23,1	20	20	20	20	20	30,0425	20	0,400505745	0,3226375	1,35
hsa-miR-33a-5p	55,11	20	24,95	20	20	20	20	20	30,015	20	0,400505745	0,289771	1,36
hsa-miR-448	57,07	20	20	20	20	20	20	20	29,2675	20	0,400505745	0,3910022	1,3
hsa-miR-454-3p	49,2	27,76	20	20	20	20	20	20	29,24	20	0,400505745	0,2439007	1,36
hsa-miR-4431	49,2	20	27,72	20	20	20	20	20	29,23	20	0,400505745	0,2443145	1,36
hsa-miR-182-3p	55,11	20	21,25	20	20	20	20	20	29,09	20	0,400505745	0,3593852	1,31
hsa-miR-3164	55,11	20	21,25	20	20	20	20	20	29,09	20	0,400505745	0,3593852	1,31
hsa-miR-2117	39,36	20	36,96	20	20	20	20	20	29,08	20	0,400505745	0,182445	1,65
hsa-miR-410-3p	49,2	25,78	21,25	20	20	20	20	20	29,0575	20	0,400505745	0,2370158	1,35
hsa-miR-362-3p	49,2	20,82	25,87	20	20	20	20	20	28,9725	20	0,400505745	0,2457334	1,35
hsa-miR-1299	47,23	20	28,64	20	20	20	20	20	28,9675	20	0,400505745	0,2310966	1,2
hsa-miR-181a-2-3p	47,23	20	28,64	20	20	20	20	20	28,9675	20	0,400505745	0,2310966	1,36
hsa-miR-302a-5p	45,26	20	30,49	20	20	20	20	20	28,9375	20	0,400505745	0,2124908	1,36
hsa-miR-1291	43,3	20	32,34	20	20	20	20	20	28,91	20	0,400505745	0,1984994	1,32
hsa-miR-205-5p	55,11	20	20	20	20	20	20	20	28,7775	20	0,400505745	0,3910022	1,44
hsa-miR-4741	55,11	20	20	20	20	20	20	20	28,7775	20	0,400505745	0,3910022	1,29
hsa-miR-3131	47,23	20	27,72	20	20	20	20	20	28,7375	20	0,400505745	0,2399574	3,44
hsa-miR-197-5p	49,2	20	24,95	20	20	20	20	20	28,5375	20	0,400505745	0,2798286	1
hsa-miR-320b	49,2	20	24,02	20	20	20	20	20	28,305	20	0,400505745	0,2953476	2,19
hsa-miR-3147	49,2	20	23,1	20	20	20	20	20	28,075	20	0,400505745	0,3128609	2,03
hsa-miR-345-5p	49,2	20	23,1	20	20	20	20	20	28,075	20	0,400505745	0,3128609	1,3
hsa-miR-195-5p	49,2	20	22,18	20	20	20	20	20	27,845	20	0,400505745	0,3327733	1,29
hsa-miR-211-5p	49,2	20	22,18	20	20	20	20	20	27,845	20	0,400505745	0,3327733	1,29
hsa-miR-208b-3p	47,23	20	24,02	20	20	20	20	20	27,8125	20	0,400505745	0,291658	1,3
hsa-miR-296-3p	51,17	20	20	20	20	20	20	20	27,7925	20	0,400505745	0,3910022	1,26
hsa-miR-330-5p	51,17	20	20	20	20	20	20	20	27,7925	20	0,400505745	0,3910022	1,26
hsa-miR-1260b	20	38,17	32,34	20	20	20	20	20	27,6275	20	0,400505745	0,18850219	1,4
hsa-miR-485-5p	45,26	20	24,02	20	20	20	20	20	27,32	20	0,400505745	0,2875148	1,28
hsa-miR-2110	49,2	20	20	20	20	20	20	20	27,3	20	0,400505745	0,3910022	1,22
hsa-miR-1285-3p	41,33	20	26,8	20	20	20	20	20	27,0325	20	0,400505745	0,2343976	1,79
hsa-miR-198	41,33	20	26,8	20	20	20	20	20	27,0325	20	0,400505745	0,2343976	1,29
hsa-miR-219a-5p	39,36	20	26,8	20	20	20	20	20	26,54	20	0,400505745	0,2279895	1,27
hsa-miR-338-5p	43,3	20	22,18	20	20	20	20	20	26,37	20	0,400505745	0,3241812	1,24
hsa-miR-302a-3p	41,33	20	24,02	20	20	20	20	20	26,3375	20	0,400505745	0,2775142	1,26
hsa-miR-346	41,33	20	24,02	20	20	20	20	20	26,3375	20	0,400505745	0,2775142	1,26
hsa-miR-133a-3p	45,26	20	20	20	20	20	20	20	26,315	20	0,400505745	0,3910022	1,52
hsa-miR-301a-5p	45,26	20	20	20	20	20	20	20	26,315	20	0,400505745	0,3910022	1,23
hsa-miR-378h	45,26	20	20	20	20	20	20	20	26,315	20	0,400505745	0,3910022	1,23
hsa-miR-4707-3p	45,26	20	20	20	20	20	20	20	26,315	20	0,400505745	0,3910022	1,23
hsa-miR-1245b-5p	45,26	20	20	20	20	20	20	20	26,315	20	0,400505745	0,391002219	1,93
hsa-miR-1249-3p	45,26	20	20	20	20	20	20	20	26,315	20	0,400505745	0,391002219	1,23
hsa-miR-1276	45,26	20	20	20	20	20	20	20	26,315	20	0,400505745	0,391002219	1,03
hsa-miR-369-3p	43,3	20	21,25	20	20	20	20	20	26,1375	20	0,400505745	0,3500903	1,23
hsa-miR-3150b-3p	41,33	20	23,1	20	20	20	20	20	26,1075	20	0,400505745	0,2972632	1,3
hsa-miR-1908-3p	39,36	20	24,95	20	20	20	20	20	26,0775	20	0,400505745	0,2541111	1,25
hsa-miR-298	43,3	20	20	20	20	20	20	20	25,825	20	0,400505745	0,3910022	1,21
hsa-miR-3168	43,3	20	20	20	20	20	20	20	25,825	20	0,400505745	0,3910022	1,21
hsa-miR-208a-3p	39,36	20	23,1	20	20	20	20	20	25,615	20	0,400505745	0,2917708	1,23
hsa-miR-329-3p	41,33	20,82	20	20	20	20	20	20	25,5375	20	0,400505745	0,3616432	1,21
hsa-miR-433-3p	41,33	20	20,33	20	20	20	20	20	25,415	20	0,400505745	0,3787611	1,2
hsa-miR-187-3p	39,36	20	22,18	20	20	20	20	20	25,385	20	0,400505745	0,31595	1,22
hsa-miR-210-5p	39,36	20	22,18	20	20	20	20	20	25,385	20	0,400505745	0,31595	1,41
hsa-miR-330-3p	41,33	20	20	20	20	20	20	20	25,3325	20	0,400505745	0,3910022	1,2
hsa-miR-412-3p	41,33	20	20	20	20	20	20	20	25,3325	20	0,400505745	0,3910022	1,2
hsa-miR-4455	41,33	20	20	20	20	20	20	20	25,3325	20	0,400505745	0,3910022	1,2
hsa-miR-4461	41,33	20	20	20	20	20	20	20	25,3325	20	0,400505745	0,3910022	1,2
hsa-miR-1228-3p	41,33	20	20	20	20	20	20	20	25,3325	20	0,400505745	0,391002219	2,2
hsa-miR-1264	41,33	20	20	20	20	20	20	20	25,3325	20	0,400505745	0,391002219	2,05
hsa-miR-1271-5p	41,33	20	20	20	20	20	20	20	25,3325	20	0,400505745	0,391002219	1,48
hsa-miR-1297	39,36	20	21,25	20	20	20	20	20	25,1525	20	0,400505745	0,3447195	1,9
hsa-miR-370-3p	20	21,81	37,88	20	20	20	20	20	24,9225	20	0,400505745	0,323425	1,2
hsa-miR-1304-3p	39,36	20	20	20	20	20	20	20	24,84	20	0,400505745	0,3910022	2,02
hsa-miR-1-3p	39,36	20	20	20	20	20	20	20	24,84	20	0,400505745	0,3910022	3,05
hsa-miR-1976	39,36	20	20	20	20	20	20	20	24,84	20	0,400505745	0,3910022	1,18
hsa-miR-25-5p	39,36	20	20	20	20	20	20	20	24,84	20	0,400505745	0,3910022	1,18
hsa-miR-3180-5p	39,36	20	20	20	20	20	20	20	24,84	20	0,400505745	0,3910022	1,18
hsa-miR-320c	39,36	20	20	20	20	20	20	20	24,84	20	0,400505745	0,3910022	1,31
hsa-miR-3614-5p	39,36	20	20	20	20	20	20	20	24,84	20	0,400505745	0,3910022	1
hsa-miR-4647	39,36	20	20	20	20	20	20	20	24,84	20	0,400505745	0,3910022	1,18
hsa-miR-455-3p	20	20	36,03	20	20	20	20	20	24,0075	20	0,400505745	0,3910022	1,16
hsa-miR-30a-3p	20	20	33,26	20	20	20	20	20	23,315	20	0,400505745	0,3910022	1,14
hsa-miR-301b-3p	20	20	32,34	20	20	20	20	20	23,085	20	0,400505745	0,3910022	1,13
hsa-miR-1469	20	20	31,41	20	20	20	20	20	22,8525	20	0,400505745	0,3910022	22,56
hsa-miR-378d	20	20	31,41	20	20	20	20	20	22,8525	20	0,400505745	0,3910022	1,12
hsa-miR-130b-3p	20	23,8	24,02	20	20	20	20	20	21,955	20	0,400505745	0,1819014	2,09
hsa-miR-1262	20	20	27,72	20	20	20	20	20	21,93	20	0,400505745	0,391002219	18,29
hsa-miR-324-3p	20	20	26,8	20	20	20	20	20	21,7	20	0,400505745	0,3910022	1,48
hsa-miR-449b-5p	20	20	26,8	20	20	20	20	20	21,7	20	0,400505745	0,3910022	1,08
hsa-miR-146b-5p	20	20	25,87	20	20	20	20	20	21,4675	20	0,400505745	0,3910022	7,41
hsa-miR-34c-5p	20	20	25,87	20	20	20	20	20	21,4675	20	0,400505745	0,3910022	1,07
hsa-miR-181c-5p	20	20	24,95	20	20	20	20	20	21,2375	20	0,400505745	0,3910022	1,06
hsa-miR-202-3p	20	20	24,95	20	20	20	20	20	21,2375	20	0,400505745	0,3910022	1,06
hsa-miR-1278	20	20	24,95	20	20	20	20	20	21,2375	20	0,400505745	0,391002219	1,23
hsa-miR-203a-5p	20	20	24,02	20	20	20	20	20	21,005	20	0,400505745	0,3910022	1,05
hsa-miR-363-5p	20	20	24,02	20	20	20	20	20	21,005	20	0,400505745	0,3910022	1,05
hsa-miR-378g	20	20	24,02	20	20	20	20	20	21,005	20	0,400505745	0,3910022	1,05
hsa-miR-491-3p	20	20	24,02	20	20	20	20	20	21,005	20	0,400505745	0,3910022	1,05
hsa-miR-491-5p	20	20	24,02	20	20	20	20	20	21,005	20	0,400505745	0,3910022	1,05
hsa-miR-1185-2-3p	20	20	24,02	20	20	20	20	20	21,005	20	0,400505745	0,391002219	1,49
hsa-miR-203a-3p	20	20	23,1	20	20	20	20	20	20,775	20	0,400505745	0,3910022	1,04
hsa-miR-224-5p	20	20	23,1	20	20	20	20	20	20,775	20	0,400505745	0,3910022	1,04
hsa-miR-328-3p	20	20	23,1	20	20	20	20	20	20,775	20	0,400505745	0,3910022	1,04
hsa-miR-301b-5p	20	20	22,18	20	20	20	20	20	20,545	20	0,400505745	0,3910022	1,03
hsa-miR-381-5p	20	20	22,18	20	20	20	20	20	20,545	20	0,400505745	0,3910022	1,03
hsa-miR-1185-1-3p	20	20	22,18	20	20	20	20	20	20,545	20	0,400505745	0,391002219	2,4
hsa-miR-1272	20	20	22,18	20	20	20	20	20	20,545	20	0,400505745	0,391002219	2,09
hsa-miR-129-5p	20	20	21,25	20	20	20	20	20	20,3125	20	0,400505745	0,3910022	1,37
hsa-miR-378b	20	20	21,25	20	20	20	20	20	20,3125	20	0,400505745	0,3910022	1,02
hsa-miR-450a-1-3p	20	20	21,25	20	20	20	20	20	20,3125	20	0,400505745	0,3910022	1,02
hsa-miR-134-3p	21	20	20	20	20	20	20	20	20,25	20	0,400505745	0,3910022	1,33
hsa-miR-1-5p	21	20	20	20	20	20	20	20	20,25	20	0,400505745	0,3910022	2,97
hsa-miR-1973	21	20	20	20	20	20	20	20	20,25	20	0,400505745	0,3910022	1,32
hsa-miR-345-3p	21	20	20	20	20	20	20	20	20,25	20	0,400505745	0,3910022	1
hsa-miR-3613-5p	21	20	20	20	20	20	20	20	20,25	20	0,400505745	0,3910022	10,14
hsa-miR-365b-5p	21	20	20	20	20	20	20	20	20,25	20	0,400505745	0,3910022	1
hsa-miR-409-5p	21	20	20	20	20	20	20	20	20,25	20	0,400505745	0,3910022	1
hsa-miR-450b-5p	21	20	20	20	20	20	20	20	20,25	20	0,400505745	0,3910022	1
hsa-miR-1233-3p	21	20	20	20	20	20	20	20	20,25	20	0,400505745	0,391002219	1,97
hsa-miR-1244	21	20	20	20	20	20	20	20	20,25	20	0,400505745	0,391002219	3,38
hsa-miR-1306-3p	20	20	20,33	20	20	20	20	20	20,0825	20	0,400505745	0,3910022	1,63
hsa-miR-147b	20	20	20,33	20	20	20	20	20	20,0825	20	0,400505745	0,3910022	1,93
hsa-miR-206	20	20	20,33	20	20	20	20	20	20,0825	20	0,400505745	0,3910022	1
hsa-miR-361-3p	20	20	20,33	20	20	20	20	20	20,0825	20	0,400505745	0,3910022	1,48
hsa-miR-4435	20	20	20,33	20	20	20	20	20	20,0825	20	0,400505745	0,3910022	1
hsa-miR-1277-3p	20	20	20,33	20	20	20	20	20	20,0825	20	0,400505745	0,391002219	1,86
hsa-miR-1253	20	20	20	20	20	20	1173,47	742,05	20	488,88	0,400505745	0,182819966	1,23
hsa-miR-630	797,06	589,97	949,84	1921,83	20	20	1542,27	890,46	1064,675	618,1825	0,40050575	0,1674891	6,29
hsa-miR-579-3p	20	20	875,92	20	20	6132,82	13712,82	13505,37	233,98	8342,7525	0,40050575	0,08641604	-42,43
hsa-miR-520a-5p	220,42	37,18	82,23	20	20	20	20	20	89,9575	20	0,40050575	0,1221896	3,03
hsa-miR-593-3p	177,12	74,86	78,54	20	20	20	20	20	87,63	20	0,40050575	0,07396073	3,38
hsa-miR-542-5p	181,06	46,6	74,84	20	20	20	20	20	80,625	20	0,40050575	0,09813578	2,98
hsa-miR-877-5p	183,03	37,68	80,39	20	20	20	20	20	80,275	20	0,40050575	0,1135956	2,89
hsa-miR-640	177,12	39,66	63,75	20	20	20	20	20	75,1325	20	0,40050575	0,1156104	2,74
hsa-miR-587	167,28	40,16	66,53	20	20	20	20	20	73,4925	20	0,40050575	0,1098375	2,73
hsa-miR-539-5p	90,53	54,04	129,36	20	20	20	20	20	73,4825	20	0,40050575	0,07428974	2,98
hsa-miR-548ah-5p	190,9	31,73	48,97	20	20	20	20	20	72,9	20	0,40050575	0,1604068	2,47
hsa-miR-520c-3p	161,38	39,17	60,98	20	20	20	20	20	70,3825	20	0,40050575	0,1138329	2,63
hsa-miR-515-3p	161,38	36,19	59,13	20	20	20	20	20	69,175	20	0,40050575	0,1229713	2,56
hsa-miR-564	173,19	34,7	44,35	20	20	20	20	20	68,06	20	0,40050575	0,151979	2,4
hsa-miR-889-3p	165,32	36,69	48,05	20	20	20	20	20	67,515	20	0,40050575	0,1360813	2,46
hsa-miR-513a-5p	157,44	40,65	44,35	20	20	20	20	20	65,61	20	0,40050575	0,129123	2,44
hsa-miR-96-5p	157,44	32,23	50,82	20	20	20	20	20	65,1225	20	0,40050575	0,1439241	2,38
hsa-miR-518f-3p	155,48	27,27	54,51	20	20	20	20	20	64,315	20	0,40050575	0,1614108	2,32
hsa-miR-592	153,51	28,75	40,65	20	20	20	20	20	60,7275	20	0,40050575	0,1784922	2,18
hsa-miR-891b	137,76	29,75	54,51	20	20	20	20	20	60,505	20	0,40050575	0,1417235	2,3
hsa-miR-608	145,64	26,77	37,88	20	20	20	20	20	57,5725	20	0,40050575	0,1951947	2,07
hsa-miR-651-5p	139,73	25,78	43,43	20	20	20	20	20	57,235	20	0,40050575	0,1834587	2,1
hsa-miR-601	118,08	25,78	63,75	20	20	20	20	20	56,9025	20	0,40050575	0,1472184	2,22
hsa-miR-92b-3p	120,05	27,27	59,13	20	20	20	20	20	56,6125	20	0,40050575	0,1422618	2,22
hsa-miR-5196-3p+hsa-miR-6732-3p	110,21	52,06	43,43	20	20	20	20	20	56,425	20	0,40050575	0,09136963	2,36
hsa-miR-6724-5p	135,79	23,8	44,35	20	20	20	20	20	55,985	20	0,40050575	0,1943873	2,06
hsa-miR-577	131,86	21,81	48,05	20	20	20	20	20	55,43	20	0,40050575	0,2024672	2,04
hsa-miR-555	129,89	23,3	48,05	20	20	20	20	20	55,31	20	0,40050575	0,1881723	2,06
hsa-miR-520d-5p+hsa-miR-527+hsa-miR-518a-5p	116,11	25,28	59,13	20	20	20	20	20	55,13	20	0,40050575	0,1528327	2,16
hsa-miR-584-5p	133,83	28,75	33,26	20	20	20	20	20	53,96	20	0,40050575	0,1947163	2
hsa-miR-516a-3p+hsa-miR-516b-3p	143,67	21,32	30,49	20	20	20	20	20	53,87	20	0,40050575	0,2755798	1,85
hsa-miR-548ai+hsa-miR-570-5p	131,86	20	42,5	20	20	20	20	20	53,59	20	0,40050575	0,2352168	1,93
hsa-miR-561-5p	133,83	20	39,73	20	20	20	20	20	53,39	20	0,40050575	0,2447129	1,91
hsa-miR-548al	123,99	24,29	44,35	20	20	20	20	20	53,1575	20	0,40050575	0,1847319	2,02
hsa-miR-941	118,08	27,76	44,35	20	20	20	20	20	52,5475	20	0,40050575	0,1573322	2,06
hsa-miR-616-3p	135,79	20	34,19	20	20	20	20	20	52,495	20	0,40050575	0,2683033	1,85
hsa-miR-758-3p+hsa-miR-411-3p	110,21	28,75	49,89	20	20	20	20	20	52,2125	20	0,40050575	0,1381297	1,24
hsa-miR-520d-3p	127,92	20,82	36,03	20	20	20	20	20	51,1925	20	0,40050575	0,2468036	1,86
hsa-miR-499b-3p	120,05	21,32	41,58	20	20	20	20	20	50,7375	20	0,40050575	0,2177745	1,91
hsa-miR-770-5p	123,99	20	38,81	20	20	20	20	20	50,7	20	0,40050575	0,2441237	1,86
hsa-miR-675-5p	131,86	20,82	29,57	20	20	20	20	20	50,5625	20	0,40050575	0,2833373	1,78
hsa-miR-571	122,02	21,81	37,88	20	20	20	20	20	50,4275	20	0,40050575	0,2255685	1,88
hsa-miR-499a-3p	118,08	24,79	38,81	20	20	20	20	20	50,42	20	0,40050575	0,1922279	1,94
hsa-miR-548i	110,21	25,78	43,43	20	20	20	20	20	49,855	20	0,40050575	0,1674065	1,98
hsa-miR-620	114,15	20	45,27	20	20	20	20	20	49,855	20	0,40050575	0,2206876	1,9
hsa-miR-591	100,37	27,27	50,82	20	20	20	20	20	49,615	20	0,40050575	0,1393311	2,04
hsa-miR-509-3-5p	118,08	20	39,73	20	20	20	20	20	49,4525	20	0,40050575	0,2383264	1,85
hsa-miR-654-5p	122,02	21,81	33,26	20	20	20	20	20	49,2725	20	0,40050575	0,2457082	1,82
hsa-miR-520g-3p	110,21	24,29	34,19	20	20	20	20	20	47,1725	20	0,40050575	0,209159	1,84
hsa-miR-589-5p	118,08	20	29,57	20	20	20	20	20	46,9125	20	0,40050575	0,2890099	1,72
hsa-miR-579-5p	114,15	24,79	28,64	20	20	20	20	20	46,895	20	0,40050575	0,2386355	1,78
hsa-miR-5196-5p	98,4	24,79	43,43	20	20	20	20	20	46,655	20	0,40050575	0,16695	1,91
hsa-miR-885-3p	110,21	21,81	34,19	20	20	20	20	20	46,5525	20	0,40050575	0,2347536	1,79
hsa-miR-520h	114,15	20	29,57	20	20	20	20	20	45,93	20	0,40050575	0,2874283	1,7
hsa-miR-551a	51,17	38,67	71,15	20	20	20	20	20	45,2475	20	0,40050575	0,0763277	2,05
hsa-miR-509-3p	102,34	20	37,88	20	20	20	20	20	45,055	20	0,40050575	0,2372061	1,76
hsa-miR-665	98,4	22,31	34,19	20	20	20	20	20	43,725	20	0,40050575	0,2211907	1,75
hsa-miR-874-5p	76,75	20,82	56,36	20	20	20	20	20	43,4825	20	0,40050575	0,176524	1,83
hsa-miR-671-5p	98,4	22,81	32,34	20	20	20	20	20	43,3875	20	0,40050575	0,2249522	1,74
hsa-miR-519d-3p	80,69	24,29	43,43	20	20	20	20	20	42,1025	20	0,40050575	0,1567379	1,81
hsa-miR-518b	49,2	67,42	31,41	20	20	20	20	20	42,0075	20	0,40050575	0,09416676	1,9
hsa-miR-610	61,01	26,77	52,67	20	20	20	20	20	40,1125	20	0,40050575	0,1127266	1,81
hsa-miR-628-3p	84,63	20	32,34	20	20	20	20	20	39,2425	20	0,40050575	0,2522699	1,62
hsa-miR-499b-5p	76,75	20	39,73	20	20	20	20	20	39,12	20	0,40050575	0,213447	1,66
hsa-miR-556-5p	78,72	20	36,96	20	20	20	20	20	38,92	20	0,40050575	0,2247215	1,64
hsa-miR-519c-3p	72,82	20	35,11	20	20	20	20	20	36,9825	20	0,40050575	0,2273212	1,59
hsa-miR-548g-3p	68,88	20	38,81	20	20	20	20	20	36,9225	20	0,40050575	0,209441	1,61
hsa-miR-526a+hsa-miR-518c-5p+hsa-miR-518d-5p	70,85	20	36,03	20	20	20	20	20	36,72	20	0,40050575	0,2213729	1,59
hsa-miR-595	76,75	23,8	25,87	20	20	20	20	20	36,605	20	0,40050575	0,2414679	1,56
hsa-miR-503-3p	76,75	20	29,57	20	20	20	20	20	36,58	20	0,40050575	0,2648618	1,54
hsa-miR-604	76,75	20	29,57	20	20	20	20	20	36,58	20	0,40050575	0,2648618	1,54
hsa-miR-582-5p	68,88	20	35,11	20	20	20	20	20	35,9975	20	0,40050575	0,2233596	1,57
hsa-miR-888-5p	70,85	20	31,41	20	20	20	20	20	35,565	20	0,40050575	0,2458141	1,54
hsa-miR-514b-5p	64,95	23,8	31,41	20	20	20	20	20	35,04	20	0,40050575	0,1808287	1,57
hsa-miR-584-3p	59,04	20	39,73	20	20	20	20	20	34,6925	20	0,40050575	0,197259	1,56
hsa-miR-517c-3p+hsa-miR-519a-3p	66,91	20	31,41	20	20	20	20	20	34,58	20	0,40050575	0,2414695	1,51
hsa-miR-874-3p	57,07	20	38,81	20	20	20	20	20	33,97	20	0,40050575	0,1974448	1,53
hsa-miR-664a-3p	49,2	36,19	29,57	20	20	20	20	20	33,74	20	0,40050575	0,08799449	1,6
hsa-miR-585-3p	66,91	20	27,72	20	20	20	20	20	33,6575	20	0,40050575	0,2714492	1,47
hsa-miR-517a-3p	57,07	20	36,03	20	20	20	20	20	33,275	20	0,40050575	0,2058474	1,51
hsa-miR-95-3p	68,88	20	22,18	20	20	20	20	20	32,765	20	0,40050575	0,3475648	1,4
hsa-miR-626	62,98	20	27,72	20	20	20	20	20	32,675	20	0,40050575	0,2668221	1,45
hsa-miR-548a-5p	59,04	20	31,41	20	20	20	20	20	32,6125	20	0,40050575	0,2312881	1,47
hsa-miR-548ar-3p	68,88	20	20	20	20	20	20	20	32,22	20	0,40050575	0,3910022	1,36
hsa-miR-497-5p	57,07	27,76	24,02	20	20	20	20	20	32,2125	20	0,40050575	0,1880049	1,48
hsa-miR-944	57,07	20	31,41	20	20	20	20	20	32,12	20	0,40050575	0,2283691	1,46
hsa-miR-499a-5p	49,2	20	38,81	20	20	20	20	20	32,0025	20	0,40050575	0,1889373	1,48
hsa-miR-548d-3p	61,01	20	26,8	20	20	20	20	20	31,9525	20	0,40050575	0,2740794	1,42
hsa-miR-761	61,01	20	26,8	20	20	20	20	20	31,9525	20	0,40050575	0,2740794	1,42
hsa-miR-615-3p	49,2	20	37,88	20	20	20	20	20	31,77	20	0,40050575	0,1907485	1,47
hsa-miR-551b-3p	55,11	21,32	29,57	20	20	20	20	20	31,5	20	0,40050575	0,2115133	1,44
hsa-miR-541-3p	55,11	20	30,49	20	20	20	20	20	31,4	20	0,40050575	0,2315069	1,43
hsa-miR-504-5p	51,17	20	34,19	20	20	20	20	20	31,34	20	0,40050575	0,2045934	1,45
hsa-miR-522-3p	62,98	20	22,18	20	20	20	20	20	31,29	20	0,40050575	0,3444088	1,37
hsa-miR-769-5p	49,2	20	35,11	20	20	20	20	20	31,0775	20	0,40050575	0,1981805	1,44
hsa-miR-631	59,04	20	24,95	20	20	20	20	20	30,9975	20	0,40050575	0,2950309	1,39
hsa-miR-766-3p	47,23	32,23	24,02	20	20	20	20	20	30,87	20	0,40050575	0,135985	1,46
hsa-miR-513b-5p	59,04	20	24,02	20	20	20	20	20	30,765	20	0,40050575	0,3090493	1,37
hsa-miR-548b-3p	55,11	20	27,72	20	20	20	20	20	30,7075	20	0,40050575	0,2554333	1,4
hsa-miR-548n	55,11	20	26,8	20	20	20	20	20	30,4775	20	0,40050575	0,2654981	1,39
hsa-miR-552-3p	61,01	20	20,33	20	20	20	20	20	30,335	20	0,40050575	0,3829922	1,33
hsa-miR-764	59,04	20	22,18	20	20	20	20	20	30,305	20	0,40050575	0,3418342	1,35
hsa-miR-605-5p	53,14	20	27,72	20	20	20	20	20	30,215	20	0,40050575	0,2520177	1,39
hsa-miR-876-3p	53,14	20	26,8	20	20	20	20	20	29,985	20	0,40050575	0,2621521	1,37
hsa-miR-548v	55,11	20	24,02	20	20	20	20	20	29,7825	20	0,40050575	0,3043414	1,35
hsa-miR-513a-3p	51,17	20	27,72	20	20	20	20	20	29,7225	20	0,40050575	0,2483224	1,37
hsa-miR-548y	49,2	20	29,57	20	20	20	20	20	29,6925	20	0,40050575	0,2275475	1,38
hsa-miR-597-5p	47,23	20	31,41	20	20	20	20	20	29,66	20	0,40050575	0,2110772	1,39
hsa-miR-638	51,17	20	26,8	20	20	20	20	20	29,4925	20	0,40050575	0,2585135	1,36
hsa-miR-607	57,07	20	20	20	20	20	20	20	29,2675	20	0,40050575	0,3910022	1,3
hsa-miR-671-3p	41,33	20	34,19	20	20	20	20	20	28,88	20	0,40050575	0,1887978	1,37
hsa-miR-532-5p	41,33	21,81	32,34	20	20	20	20	20	28,87	20	0,40050575	0,1536095	1,38
hsa-miR-532-3p	55,11	20	20,33	20	20	20	20	20	28,86	20	0,40050575	0,3821973	1,29
hsa-miR-765	55,11	20	20	20	20	20	20	20	28,7775	20	0,40050575	0,3910022	1,29
hsa-miR-548e-3p	47,23	20	25,87	20	20	20	20	20	28,275	20	0,40050575	0,2621545	1,32
hsa-miR-617	47,23	20	25,87	20	20	20	20	20	28,275	20	0,40050575	0,2621545	1,32
hsa-miR-542-3p	41,33	20	30,49	20	20	20	20	20	27,955	20	0,40050575	0,2032909	1,33
hsa-miR-629-5p	41,33	20	30,49	20	20	20	20	20	27,955	20	0,40050575	0,2032909	1,33
hsa-miR-520a-3p	51,17	20	20	20	20	20	20	20	27,7925	20	0,40050575	0,3910022	1,26
hsa-miR-936	39,36	20	31,41	20	20	20	20	20	27,6925	20	0,40050575	0,194165	1,33
hsa-miR-624-3p	49,2	20	20,33	20	20	20	20	20	27,3825	20	0,40050575	0,3811016	1,26
hsa-miR-506-3p	49,2	20	20	20	20	20	20	20	27,3	20	0,40050575	0,3910022	1,25
hsa-miR-922	47,23	20	21,25	20	20	20	20	20	27,12	20	0,40050575	0,3540053	1,26
hsa-miR-501-3p	47,23	20	20,33	20	20	20	20	20	26,89	20	0,40050575	0,380637	1,24
hsa-miR-660-3p	47,23	20	20,33	20	20	20	20	20	26,89	20	0,40050575	0,380637	1,24
hsa-miR-744-5p	47,23	20	20,33	20	20	20	20	20	26,89	20	0,40050575	0,380637	1
hsa-miR-556-3p	45,26	20	22,18	20	20	20	20	20	26,86	20	0,40050575	0,3274275	1,26
hsa-miR-512-3p	47,23	20	20	20	20	20	20	20	26,8075	20	0,40050575	0,3910022	1,24
hsa-miR-518c-3p	47,23	20	20	20	20	20	20	20	26,8075	20	0,40050575	0,3910022	1,24
hsa-miR-548j-5p	47,23	20	20	20	20	20	20	20	26,8075	20	0,40050575	0,3910022	1,24
hsa-miR-573	47,23	20	20	20	20	20	20	20	26,8075	20	0,40050575	0,3910022	1,24
hsa-miR-576-5p	45,26	20	21,25	20	20	20	20	20	26,6275	20	0,40050575	0,352183	1,25
hsa-miR-891a-5p	45,26	20	20,33	20	20	20	20	20	26,3975	20	0,40050575	0,3801037	1,23
hsa-miR-500a-5p+hsa-miR-501-5p	43,3	20	22,18	20	20	20	20	20	26,37	20	0,40050575	0,3241812	1,24
hsa-miR-548z+hsa-miR-548h-3p	41,33	20	24,02	20	20	20	20	20	26,3375	20	0,40050575	0,2775142	1,26
hsa-miR-508-3p	45,26	20	20	20	20	20	20	20	26,315	20	0,40050575	0,3910022	1,23
hsa-miR-942-5p	45,26	20	20	20	20	20	20	20	26,315	20	0,40050575	0,3910022	1,23
hsa-miR-548j-3p	39,36	20	25,87	20	20	20	20	20	26,3075	20	0,40050575	0,2398947	1,26
hsa-miR-625-5p	41,33	20	22,18	20	20	20	20	20	25,8775	20	0,40050575	0,3203968	1,23
hsa-miR-512-5p	39,36	20	23,1	20	20	20	20	20	25,615	20	0,40050575	0,2917708	1,23
hsa-miR-548ak	39,36	20	23,1	20	20	20	20	20	25,615	20	0,40050575	0,2917708	1,23
hsa-miR-548e-5p	39,36	20	23,1	20	20	20	20	20	25,615	20	0,40050575	0,2917708	1,23
hsa-miR-495-5p	41,33	20	20	20	20	20	20	20	25,3325	20	0,40050575	0,3910022	1,2
hsa-miR-509-5p	41,33	20	20	20	20	20	20	20	25,3325	20	0,40050575	0,3910022	1,2
hsa-miR-502-3p	39,36	20	21,25	20	20	20	20	20	25,1525	20	0,40050575	0,3447195	1,2
hsa-miR-767-5p	39,36	20	21,25	20	20	20	20	20	25,1525	20	0,40050575	0,3447195	1,2
hsa-miR-508-5p	39,36	20	20	20	20	20	20	20	24,84	20	0,40050575	0,3910022	1,18
hsa-miR-514a-3p	39,36	20	20	20	20	20	20	20	24,84	20	0,40050575	0,3910022	1,18
hsa-miR-544a	39,36	20	20	20	20	20	20	20	24,84	20	0,40050575	0,3910022	1,18
hsa-miR-548d-5p	20	20	36,03	20	20	20	20	20	24,0075	20	0,40050575	0,3910022	1,16
hsa-miR-600	20	20	34,19	20	20	20	20	20	23,5475	20	0,40050575	0,3910022	1,14
hsa-miR-519b-5p+hsa-miR-519c-5p+hsa-miR-523-5p+hsa-miR-518e-5p+hsa-miR-522-5p+hsa-miR-519a-5p	20	20	31,41	20	20	20	20	20	22,8525	20	0,40050575	0,3910022	1,12
hsa-miR-505-3p	20	20	29,57	20	20	20	20	20	22,3925	20	0,40050575	0,3910022	1,1
hsa-miR-567	20	20	28,64	20	20	20	20	20	22,16	20	0,40050575	0,3910022	1,09
hsa-miR-596	20	20	28,64	20	20	20	20	20	22,16	20	0,40050575	0,3910022	1,09
hsa-miR-502-5p	20	20	26,8	20	20	20	20	20	21,7	20	0,40050575	0,3910022	1,08
hsa-miR-496	20	20	24,95	20	20	20	20	20	21,2375	20	0,40050575	0,3910022	1,06
hsa-miR-7-5p	20	20	24,95	20	20	20	20	20	21,2375	20	0,40050575	0,3910022	2,11
hsa-miR-939-5p	20	20	24,95	20	20	20	20	20	21,2375	20	0,40050575	0,3910022	1,06
hsa-miR-873-5p	20	20	24,02	20	20	20	20	20	21,005	20	0,40050575	0,3910022	1,05
hsa-miR-892a	20	20	23,1	20	20	20	20	20	20,775	20	0,40050575	0,3910022	1,04
hsa-miR-548aa+hsa-miR-548t-3p	20	20	22,18	20	20	20	20	20	20,545	20	0,40050575	0,3910022	1,03
hsa-miR-627-3p	20	20	22,18	20	20	20	20	20	20,545	20	0,40050575	0,3910022	1,03
hsa-miR-98-3p	20	20	22,18	20	20	20	20	20	20,545	20	0,40050575	0,3910022	1,03
hsa-miR-548k	20	20	21,25	20	20	20	20	20	20,3125	20	0,40050575	0,3910022	1,02
hsa-miR-664b-3p	20	20	21,25	20	20	20	20	20	20,3125	20	0,40050575	0,3910022	1,02
hsa-miR-511-5p	21	20	20	20	20	20	20	20	20,25	20	0,40050575	0,3910022	1
hsa-miR-515-5p	21	20	20	20	20	20	20	20	20,25	20	0,40050575	0,3910022	1
hsa-miR-525-3p	21	20	20	20	20	20	20	20	20,25	20	0,40050575	0,3910022	1
hsa-miR-525-5p	21	20	20	20	20	20	20	20	20,25	20	0,40050575	0,3910022	1
hsa-miR-563	21	20	20	20	20	20	20	20	20,25	20	0,40050575	0,3910022	1
hsa-miR-570-3p	21	20	20	20	20	20	20	20	20,25	20	0,40050575	0,3910022	1
hsa-miR-603	21	20	20	20	20	20	20	20	20,25	20	0,40050575	0,3910022	1
hsa-miR-654-3p	21	20	20	20	20	20	20	20	20,25	20	0,40050575	0,3910022	1
hsa-miR-708-5p	21	20	20	20	20	20	20	20	20,25	20	0,40050575	0,3910022	1,06
hsa-miR-890	21	20	20	20	20	20	20	20	20,25	20	0,40050575	0,3910022	1
hsa-miR-934	21	20	20	20	20	20	20	20	20,25	20	0,40050575	0,3910022	15,86
hsa-miR-937-3p	21	20	20	20	20	20	20	20	20,25	20	0,40050575	0,3910022	1
hsa-miR-661	20	20	20,33	20	20	20	20	20	20,0825	20	0,40050575	0,3910022	1
hsa-miR-221-3p	1230,03	1278,1	1469,11	2361,42	20	1803,77	1139,94	2250,9	1584,665	1303,6525	0,408727213	0,3997214	19,38
hsa-miR-29a-3p	1182,79	842,32	1016,37	2062,72	20	931,95	1374,63	1533,58	1276,05	965,04	0,417012446	0,4085308	2,7
hsa-miR-223-3p	413,29	6985,42	734,56	123,99	1374,71	2495,22	1072,89	717,32	2064,315	1415,035	0,418960076	0,411149	14,51
hsa-miR-100-5p	1003,7	734,73	628,3	1425,87	824,83	721,51	1072,89	1706,72	948,15	1081,4875	0,491467862	0,483137898	1,18
hsa-miR-126-3p	265,69	3502,62	474	20	903,38	1352,83	20	20	1065,5775	574,0525	0,500160829	0,492531257	1,33
hsa-miR-548q	41,33	20	27,72	20	20	20	938,78	20	27,2625	249,695	0,52485556	0,5177389	-2,01
hsa-miR-4443	186,96	40,65	101,64	180,35	20	751,57	20	20	127,4	202,8925	0,578822929	0,5719555	2,19
hsa-miR-155-5p	277,49	105,1	156,15	197,26	20	631,32	20	519,44	184	297,69	0,697058523	0,6899698	2,49
hsa-miR-411-5p	84,63	41,15	64,68	135,26	20	20	737,61	20	81,43	199,4025	0,709347132	0,7033357	1,51
hsa-miR-29b-3p	818,71	894,37	847,28	2925,01	1060,49	931,95	1341,11	1855,13	1371,3425	1297,17	0,729979585	0,7250306	-1,08
hsa-miR-363-3p	84,63	32,23	47,12	118,35	20	631,32	20	20	70,5825	172,83	0,822523098	0,8183408	1,32
hsa-miR-520f-3p	204,68	37,68	93,32	20	20	20	737,61	20	88,92	199,4025	0,82461488	0,8218196	1,25
hsa-miR-549a	127,92	28,75	66,53	20	20	20	905,25	20	60,8	241,3125	0,92263164	0,9226316	-1,1
hsa-miR-644a	137,76	31,73	48,05	20	20	20	804,66	20	59,385	216,165	0,92263164	0,9212046	-1,11
