# Supplementary material for: Characterization and miRNA Profiling of Extracellular Vesicles from Human Osteoarthritic Subchondral Bone Multipotential Stromal Cells (MSCs)
Source: Stem Cells Int. 2021 Oct 9;2021:7232773. doi: 10.1155/2021/7232773 (PMC8520657; doi:10.1155/2021/7232773)
Supplement: Supplementary 4 — Supplementary Data 2: analysis of miRNAs in OA-EVs compared with their parental MSCs, showing the differential expression, with and without FDR correction, fold change (FC) and p value. [file 7232773.f4.txt]

Probe Name	MSC1 : OA	MSC2 : OA	MSC3 : OA	MSC4 : OA	EV1 : OA	EV2 : OA	EV3 : OA	EV4 : OA	Av. MSC	Av. EV	EV : OA vs. MSC : OA	adj.Pvalue	Pvalue
hsa-miR-4454+hsa-miR-7975	8754,25	10630,91	10244,89	14496,38	10801,32	11634,32	19010,19	21989,51	11031,6075	15858,835	1,4	0,091011752	0,0640797
hsa-miR-579-3p	20	76,51	20	20	20	6132,82	13712,82	13505,37	34,1275	8342,7525	78,05	0,0923493	0,06596378
hsa-miR-125b-5p	29814,99	26777,96	26845,98	25094,64	5577,41	5381,25	5330,9	7692,62	27133,3925	5995,545	-4,57	0,00239125	0,000902819
hsa-miR-199a-3p+hsa-miR-199b-3p	8679,87	6141,14	7992,82	11360,17	2356,65	2044,27	1978,13	2745,6	8543,5	2281,1625	-3,69	0,001280589	0,00037895
hsa-miR-21-5p	5142,88	4937,63	4786,8	3985,66	2003,15	1863,9	1944,61	2869,27	4713,2425	2170,2325	-2,2	0,024264425	0,01436058
hsa-let-7b-5p	9292,09	9985,9	9335,4	9841,31	1767,49	1743,65	2279,88	2226,16	9613,675	2004,295	-4,83	0,001070908	0,000256297
hsa-let-7a-5p	27382,3	27481,24	27371,38	29674,12	20	2435,09	972,3	4328,64	27977,26	1939,0075	-41,55	0,078618189	0,05317315
hsa-miR-4286	75,34	71,21	118,53	157,16	1217,6	721,51	2279,88	1978,81	105,56	1549,45	14,11	0,001212862	0,000326848
hsa-miR-142-3p	20	20	20	20	1453,27	2705,66	1072,89	840,99	20	1518,2025	68,62	0,001463803	0,00046304
hsa-miR-223-3p	20	20	20	20	1374,71	2495,22	1072,89	717,32	20	1415,035	63,73	0,001642659	0,000538719
hsa-miR-221-3p	3796,37	4804,63	4180,47	3923,99	20	1803,77	1139,94	2250,9	4176,365	1303,6525	-7,54	0,204697093	0,1597891
hsa-miR-29b-3p	7582,25	5247,19	9427,72	8203,08	1060,49	931,95	1341,11	1855,13	7615,06	1297,17	-5,95	0,001642659	0,000550606
hsa-miR-23a-3p	3094,5	2561,21	2472,04	3954,82	1178,33	1352,83	1139,94	1459,37	3020,6425	1282,6175	-2,32	0,005082786	0,002126471
hsa-miR-6721-5p	20	20	20	24,87	1413,99	1112,33	1274,05	544,17	21,2175	1086,135	48,39	0,00205442	0,00072324
hsa-miR-100-5p	4305,6	3578,75	4389,04	7776,36	824,83	721,51	1072,89	1706,72	5012,4375	1081,4875	-4,69	0,000583825	9,03E-05
hsa-miR-29a-3p	3790,65	3845,94	5191,4	4514,83	20	931,95	1374,63	1533,58	4335,705	965,04	-9,66	0,142372426	0,1069995
hsa-let-7i-5p	3257,57	3060,27	3293,77	3127,26	824,83	811,7	972,3	717,32	3184,7175	831,5375	-3,85	0,000719851	0,000128545
hsa-miR-16-5p	2963,86	3405,14	3528,56	2400,15	20	1052,2	1005,83	939,93	3074,4275	754,49	-8,1	0,158339991	0,1203707
hsa-miR-199a-5p	2459,39	1902,08	2184,83	2786,08	20	721,51	938,78	1038,87	2333,095	679,79	-6,71	0,187699647	0,1446053
hsa-miR-630	20	20	20	20	20	20	1542,27	890,46	20	618,1825	7,65	0,2310721	0,1831357
hsa-miR-15b-5p	2013,1	2158,08	2409,36	2067,93	785,55	962,01	20	643,11	2162,1175	602,6675	-6,87	0,179896218	0,1376757
hsa-miR-126-3p	20	20	34,19	20	903,38	1352,83	20	20	23,5475	574,0525	6,5	0,279583763	0,2291844
hsa-miR-1253	20	20	20	20	20	20	1173,47	742,05	20	488,88	6,83	0,231072132	0,18282
hsa-miR-4531	20	20	20	20	20	661,38	737,61	519,44	20	484,6075	13,34	0,083825806	0,05816484
hsa-miR-155-5p	156,39	221,87	185,77	131,3	20	631,32	20	519,44	173,8325	297,69	-1,59	0,664022637	0,6640226
hsa-miR-548q	20	20	20	20	20	20	938,78	20	20	249,695	2,62	0,3950332	0,3910022
hsa-miR-549a	20	20	20	20	20	20	905,25	20	20	241,3125	2,59	0,3950332	0,3910022
hsa-miR-26a-5p	644,65	710,34	574,42	315,31	903,38	20	20	20	561,18	240,845	-10,35	0,111888874	0,08220407
hsa-miR-644a	20	20	20	20	20	20	804,66	20	20	216,165	2,52	0,3950332	0,3910022
hsa-miR-4443	226,96	215,98	235,92	293,43	20	751,57	20	20	243,0725	202,8925	-4,87	0,24022188	0,1924226
hsa-miR-411-5p	113,48	116,53	87,76	122,34	20	20	737,61	20	110,0275	199,4025	-2,21	0,476836676	0,4744038
hsa-miR-520f-3p	20	20	20	20	20	20	737,61	20	20	199,4025	2,46	0,39503317	0,3910022
hsa-miR-22-3p	598,87	539,67	606,33	583,87	20	20	20	667,85	582,185	181,9625	-12,1	0,09216451	0,06536157
hsa-miR-145-5p	460,6	544,38	518,57	743,02	20	20	20	667,85	566,6425	181,9625	-11,6	0,077697492	0,05193047
hsa-miR-363-3p	20	20	20	20	20	631,32	20	20	20	172,83	2,37	0,39503317	0,3910022
hsa-miR-365a-3p+hsa-miR-365b-3p	1127,18	1154,08	1217,22	759,93	20	601,26	20	20	1064,6025	165,315	-22,36	0,051331252	0,03273677
hsa-let-7d-5p	845,86	786,84	933,43	934	20	601,26	20	20	875,0325	165,315	-18,64	0,069347009	0,04564165
hsa-miR-374a-5p	1139,58	1008,12	1243,43	1371,66	20	20	20	593,64	1190,6975	163,41	-25,34	0,044477808	0,02723131
hsa-let-7g-5p	1576,34	1525,43	1692,48	1308	20	20	20	20	1525,5625	20	-75,95	0,000122876	4,36E-06
hsa-miR-99a-5p	1367,49	1556,62	1681,08	1430,34	20	20	20	20	1508,8825	20	-75,21	0,000122876	2,62E-06
hsa-let-7c-5p	1410,41	1789,67	1706,15	1081,21	20	20	20	20	1496,86	20	-73,45	0,000325326	4,15E-05
hsa-miR-15a-5p	1257,83	1058,15	1314,09	1687,96	20	20	20	20	1329,5075	20	-65,54	0,000277934	2,69E-05
hsa-miR-199b-5p	1266,41	1142,31	1414,39	1003,63	20	20	20	20	1206,685	20	-59,85	0,000189943	1,26E-05
hsa-miR-125a-5p	1072,82	861	1016,63	1181,67	20	20	20	20	1033,03	20	-51,32	0,000183203	1,05E-05
hsa-miR-27b-3p	994,63	1128,18	982,43	936,98	20	20	20	20	1010,555	20	-50,41	0,000122876	2,28E-06
hsa-let-7e-5p	980,32	806,85	927,73	818,62	20	20	20	20	883,38	20	-44,02	0,000122876	4,39E-06
hsa-miR-191-5p	699,96	683,85	703,2	1002,63	20	20	20	20	772,41	20	-38,11	0,000298683	3,50E-05
hsa-miR-376a-3p	864,94	873,35	541,36	796,73	20	20	20	20	769,095	20	-37,78	0,000480557	6,62E-05
hsa-miR-34a-5p	833,47	401,95	674,71	845,47	20	20	20	20	688,9	20	-33,06	0,001070908	0,000267727
hsa-let-7f-5p	698,05	803,91	780,7	416,77	20	20	20	20	674,8575	20	-32,68	0,000885947	0,000185326
hsa-miR-148a-3p	662,77	739,76	514,01	693,29	20	20	20	20	652,4575	20	-32,33	0,000277934	2,65E-05
hsa-miR-98-5p	552,15	589,1	565,3	552,04	20	20	20	20	564,6475	20	-28,22	4,15E-05	2,12E-07
hsa-miR-196a-5p	665,63	426,08	480,96	672,4	20	20	20	20	561,2675	20	-27,52	0,000583825	9,28E-05
hsa-miR-127-3p	542,61	540,26	333,94	722,13	20	20	20	20	534,735	20	-25,78	0,001070908	0,000260622
hsa-miR-93-5p	385,26	470,81	635,96	502,31	20	20	20	20	498,585	20	-24,53	0,000517196	7,39E-05
hsa-miR-424-5p	382,4	407,25	461,58	639,58	20	20	20	20	472,7025	20	-23,15	0,00063147	0,000106319
hsa-miR-1260a	390,99	453,16	558,46	431,69	20	20	20	20	458,575	20	-22,73	0,000285842	3,06E-05
hsa-miR-130a-3p	437,71	417,84	477,54	490,37	20	20	20	20	455,865	20	-22,75	0,000122876	3,75E-06
hsa-miR-99b-5p	475,86	392,54	488,94	441,64	20	20	20	20	449,745	20	-22,41	0,000170269	8,69E-06
hsa-miR-214-3p	534,03	411,37	512,87	270,55	20	20	20	20	432,205	20	-20,89	0,001151998	0,000294356
hsa-miR-222-3p	472,04	404,31	374,97	452,58	20	20	20	20	425,975	20	-21,21	0,000183203	1,12E-05
hsa-miR-136-5p	484,44	427,26	247,32	446,61	20	20	20	20	401,4075	20	-19,44	0,001151998	0,000299755
hsa-miR-382-5p	415,78	435,5	265,55	419,75	20	20	20	20	384,145	20	-18,85	0,000738032	0,000139322
hsa-miR-19b-3p	329	392,54	431,95	360,07	20	20	20	20	378,39	20	-18,82	0,000212355	1,73E-05
hsa-miR-23b-3p	456,78	391,95	315,7	344,16	20	20	20	20	377,1475	20	-18,67	0,000345113	4,58E-05
hsa-miR-25-3p	280,36	328,39	349,89	402,84	20	20	20	20	340,37	20	-16,88	0,000325326	4,14E-05
hsa-miR-376c-3p	455,83	383,71	238,2	272,54	20	20	20	20	337,57	20	-16,32	0,001215407	0,000337302
hsa-miR-20a-5p+hsa-miR-20b-5p	249,85	361,35	377,25	273,54	20	20	20	20	315,4975	20	-15,53	0,000645456	0,000111967
hsa-miR-181a-5p	310,88	181,85	234,78	496,34	20	20	20	20	305,9625	20	-14,24	0,002908142	0,001142484
hsa-miR-379-5p	314,7	259,53	184,63	317,3	20	20	20	20	269,04	20	-13,15	0,001070908	0,000260308
hsa-miR-337-5p	336,63	280,72	191,47	239,72	20	20	20	20	262,135	20	-12,83	0,001030875	0,000226161
hsa-miR-106a-5p+hsa-miR-17-5p	209,8	288,96	317,98	209,88	20	20	20	20	256,655	20	-12,61	0,000829627	0,000169312
hsa-miR-409-3p	292,76	270,13	206,29	219,82	20	20	20	20	247,25	20	-12,24	0,000539631	7,98E-05
hsa-miR-299-5p	293,72	260,12	153,86	249,66	20	20	20	20	239,34	20	-11,64	0,001385294	0,00042407
hsa-miR-337-3p	280,36	286,61	139,05	200,92	20	20	20	20	226,735	20	-10,88	0,002160889	0,000782771
hsa-miR-24-3p	215,52	219,52	214,27	240,71	20	20	20	20	222,505	20	-11,11	0,000122876	3,14E-06
hsa-miR-450a-5p	213,61	207,75	210,85	239,72	20	20	20	20	217,9825	20	-10,88	0,000139171	5,68E-06
hsa-miR-377-3p	238,41	193,62	139,05	295,42	20	20	20	20	216,625	20	-10,43	0,002002726	0,000694823
hsa-miR-107	205,98	231,29	208,57	182,03	20	20	20	20	206,9675	20	-10,31	0,000235718	2,04E-05
hsa-miR-19a-3p	169,74	204,8	257,58	175,06	20	20	20	20	201,795	20	-9,95	0,000787668	0,00015673
hsa-miR-140-5p	169,74	208,33	144,74	282,49	20	20	20	20	201,325	20	-9,75	0,001642659	0,000552969
hsa-miR-10b-5p	148,77	280,72	216,55	113,39	20	20	20	20	189,8575	20	-8,95	0,004004668	0,001634558
hsa-miR-193a-5p+hsa-miR-193b-5p	186,91	191,27	255,3	118,37	20	20	20	20	187,9625	20	-9,06	0,002204175	0,000809697
hsa-miR-361-5p	183,1	187,15	165,26	190,98	20	20	20	20	181,6225	20	-9,07	0,000148621	6,82E-06
hsa-miR-374b-5p	186,91	160,66	194,89	171,08	20	20	20	20	178,385	20	-8,89	0,000212355	1,73E-05
hsa-miR-196b-5p	160,21	178,32	193,75	137,27	20	20	20	20	167,3875	20	-8,3	0,000583825	9,53E-05
hsa-miR-574-5p	185,96	170,08	144,74	159,15	20	20	20	20	164,9825	20	-8,21	0,000298683	3,49E-05
hsa-miR-28-5p	143,04	140,65	118,53	200,92	20	20	20	20	150,785	20	-7,4	0,001262712	0,000367217
hsa-miR-574-3p	149,72	123,59	131,07	146,22	20	20	20	20	137,65	20	-6,86	0,000281679	2,87E-05
hsa-miR-106b-5p	124,92	153,01	143,6	97,48	20	20	20	20	129,7525	20	-6,39	0,001215407	0,000341058
hsa-miR-503-5p	88,69	105,34	139,05	184,01	20	20	20	20	129,2725	20	-6,22	0,003584365	0,001444718
hsa-miR-543	135,41	120,06	101,43	156,16	20	20	20	20	128,265	20	-6,33	0,001070908	0,000266409
hsa-miR-32-5p	120,16	111,82	129,93	127,32	20	20	20	20	122,3075	20	-6,1	0,000198862	1,42E-05
hsa-miR-31-5p	116,34	143,6	116,25	94,49	20	20	20	20	117,67	20	-5,82	0,001070908	0,000249618
hsa-miR-30b-5p	103,94	128,3	148,16	62,66	20	20	20	20	110,765	20	-5,27	0,006734596	0,003058056
hsa-miR-1234-3p	113,48	74,15	169,82	83,55	20	20	20	20	110,25	20	-5,23	0,006631628	0,002949771
hsa-miR-495-3p	129,69	105,93	84,34	103,45	20	20	20	20	105,8525	20	-5,23	0,001212862	0,000327968
hsa-miR-485-3p	112,53	107,11	70,66	113,39	20	20	20	20	100,9225	20	-4,96	0,002160889	0,000773382
hsa-miR-381-3p	108,71	115,35	87,76	91,51	20	20	20	20	100,8325	20	-5,01	0,000777185	0,000150679
hsa-miR-92a-3p	78,2	108,29	148,16	54,71	20	20	20	20	97,34	20	-4,55	0,01113441	0,005794436
hsa-miR-29c-3p	107,76	95,93	104,85	78,58	20	20	20	20	96,78	20	-4,8	0,000963162	0,000206392
hsa-miR-143-3p	61,03	128,3	28,49	142,24	20	20	20	20	90,015	20	-3,75	0,059320061	0,03843698
hsa-miR-376b-3p	119,2	112,41	60,4	65,65	20	20	20	20	89,415	20	-4,27	0,007911662	0,003794368
hsa-miR-218-5p	84,87	28,25	123,09	109,41	20	20	20	20	86,405	20	-3,77	0,046237548	0,02901642
hsa-miR-26b-5p	109,67	91,22	76,36	66,64	20	20	20	20	85,9725	20	-4,22	0,002392566	0,000915523
hsa-miR-3195	162,12	31,19	95,74	51,72	20	20	20	20	85,1925	20	-3,54	0,05971601	0,03899821
hsa-miR-4488	138,28	40,02	111,69	36,8	20	20	20	20	81,6975	20	-3,45	0,056426271	0,03627403
hsa-miR-323a-3p	86,78	84,16	46,73	92,5	20	20	20	20	77,5425	20	-3,75	0,007743809	0,003634849
hsa-miR-656-3p	103,94	84,16	54,71	64,65	20	20	20	20	76,865	20	-3,73	0,006099844	0,00264534
hsa-miR-590-5p	72,48	87,69	79,78	53,71	20	20	20	20	73,415	20	-3,61	0,003056094	0,001216201
hsa-miR-423-3p	69,61	78,86	82,06	56,7	20	20	20	20	71,8075	20	-3,55	0,001789937	0,000611866
hsa-miR-151a-3p	70,57	85,92	62,68	62,66	20	20	20	20	70,4575	20	-3,49	0,001463803	0,000459264
hsa-miR-132-3p	79,15	71,8	58,13	62,66	20	20	20	20	67,935	20	-3,37	0,001320753	0,000397574
hsa-miR-197-3p	85,83	67,09	69,52	46,75	20	20	20	20	67,2975	20	-3,29	0,005878863	0,002519513
hsa-miR-299-3p	88,69	85,33	46,73	44,76	20	20	20	20	66,3775	20	-3,15	0,015231131	0,008548084
hsa-miR-487b-3p	72,48	75,92	54,71	61,67	20	20	20	20	66,195	20	-3,28	0,001642659	0,00055314
hsa-miR-487a-3p	89,64	78,27	47,87	48,74	20	20	20	20	66,13	20	-3,18	0,011060554	0,005586708
hsa-miR-423-5p	87,73	61,21	62,68	47,74	20	20	20	20	64,84	20	-3,17	0,006145233	0,002696378
hsa-miR-5196-3p+hsa-miR-6732-3p	71,52	72,39	76,36	38,79	20	20	20	20	64,765	20	-3,13	0,011134407	0,005685889
hsa-miR-154-5p	71,52	68,86	38,75	78,58	20	20	20	20	64,4275	20	-3,11	0,011134407	0,005794165
hsa-miR-18a-5p	46,73	54,73	83,2	68,63	20	20	20	20	63,3225	20	-3,09	0,006631628	0,002977466
hsa-miR-148b-3p	70,57	55,32	50,15	71,62	20	20	20	20	61,915	20	-3,06	0,002794892	0,001083734
hsa-miR-342-3p	43,87	61,21	52,43	73,61	20	20	20	20	57,78	20	-2,84	0,005878863	0,002507136
hsa-miR-455-5p	43,87	48,85	63,82	64,65	20	20	20	20	55,2975	20	-2,73	0,004682872	0,001935268
hsa-miR-186-5p	43,87	55,32	74,08	46,75	20	20	20	20	55,005	20	-2,69	0,007467751	0,00346717
hsa-miR-431-5p	63,89	58,26	36,47	50,73	20	20	20	20	52,3375	20	-2,56	0,00943302	0,004620254
hsa-miR-10a-5p	44,82	35,31	50,15	75,6	20	20	20	20	51,47	20	-2,47	0,018760623	0,01072036
hsa-miR-324-5p	52,45	55,32	52,43	43,77	20	20	20	20	50,9925	20	-2,54	0,001262712	0,000361765
hsa-miR-137	39,1	27,66	37,61	94,49	20	20	20	20	49,715	20	-2,21	0,083240756	0,05733419
hsa-miR-135b-5p	40,05	64,74	27,35	66,64	20	20	20	20	49,695	20	-2,33	0,045995233	0,02839502
hsa-miR-151a-5p	50,54	63,56	38,75	45,76	20	20	20	20	49,6525	20	-2,44	0,007114115	0,003266685
hsa-miR-181a-3p	50,54	21,78	39,89	77,58	20	20	20	20	47,4475	20	-2,15	0,090500278	0,06325785
hsa-miR-30c-5p	50,54	52,97	50,15	32,82	20	20	20	20	46,62	20	-2,29	0,010166816	0,005083408
hsa-miR-593-3p	51,5	57,67	43,31	31,83	20	20	20	20	46,0775	20	-2,25	0,01478446	0,008221968
hsa-miR-296-5p	35,28	47,08	41,03	58,69	20	20	20	20	45,52	20	-2,24	0,010134513	0,00501555
hsa-miR-370-3p	58,17	44,14	36,47	36,8	20	20	20	20	43,895	20	-2,15	0,011290744	0,005933401
hsa-miR-320e	46,73	36,49	55,85	34,81	20	20	20	20	43,47	20	-2,13	0,011978384	0,006355877
hsa-miR-1180-3p	32,42	40,61	44,45	48,74	20	20	20	20	41,555	20	-2,05	0,007882319	0,00374008
hsa-miR-432-5p	49,59	33,55	33,05	42,77	20	20	20	20	39,74	20	-1,96	0,011998447	0,006427739
hsa-miR-455-3p	39,1	49,44	42,17	27,85	20	20	20	20	39,64	20	-1,94	0,020539068	0,01194619
hsa-miR-758-3p+hsa-miR-411-3p	41,01	40,02	28,49	48,74	20	20	20	20	39,565	20	-1,94	0,01707268	0,009668711
hsa-miR-331-3p	31,47	32,37	52,43	40,78	20	20	20	20	39,2625	20	-1,92	0,020539068	0,0118651
hsa-miR-340-5p	42,91	37,66	34,19	39,79	20	20	20	20	38,6375	20	-1,93	0,002258384	0,000841133
hsa-miR-7-5p	40,05	20,6	46,73	46,75	20	20	20	20	38,5325	20	-1,83	0,07861819	0,05334806
hsa-miR-335-5p	24,79	60,62	35,33	32,82	20	20	20	20	38,39	20	-1,82	0,074741918	0,04957372
hsa-miR-27a-3p	32,42	29,43	43,31	35,81	20	20	20	20	35,2425	20	-1,74	0,012347934	0,006677964
hsa-miR-301a-3p	36,24	35,31	28,49	39,79	20	20	20	20	34,9575	20	-1,74	0,009025895	0,004374796
hsa-miR-769-5p	24,79	25,89	50,15	35,81	20	20	20	20	34,16	20	-1,64	0,08324076	0,05712072
hsa-miR-889-3p	34,33	31,78	26,21	35,81	20	20	20	20	32,0325	20	-1,59	0,01235498	0,006744809
hsa-miR-185-5p	30,52	41,2	28,49	25,86	20	20	20	20	31,5175	20	-1,55	0,036827733	0,0221718
hsa-miR-149-5p	29,56	31,78	30,77	31,83	20	20	20	20	30,985	20	-1,55	0,000738032	0,000137944
hsa-miR-146a-5p	29,56	20	30,77	41,78	20	20	20	20	30,5275	20	-1,48	0,111888874	0,08191088
hsa-miR-181b-5p+hsa-miR-181d-5p	32,42	21,19	26,21	40,78	20	20	20	20	30,15	20	-1,46	0,100924906	0,07311906
hsa-miR-30e-3p	20	25,31	36,47	36,8	20	20	20	20	29,645	20	-1,44	0,126092547	0,09328275
hsa-miR-92b-3p	25,75	32,96	35,33	23,87	20	20	20	20	29,4775	20	-1,45	0,0462004	0,02875739
hsa-miR-4516	45,77	23,54	28,49	20	20	20	20	20	29,45	20	-1,4	0,202748358	0,1572334
hsa-miR-28-3p	25,75	36,49	23,93	29,84	20	20	20	20	29,0025	20	-1,43	0,048891033	0,03093106
hsa-miR-30a-3p	20,03	20	23,93	51,72	20	20	20	20	28,92	20	-1,33	0,356699653	0,3002829
hsa-miR-193a-3p	28,61	33,55	28,49	20	20	20	20	20	27,6625	20	-1,36	0,093367508	0,06716744
hsa-miR-152-3p	23,84	27,66	28,49	29,84	20	20	20	20	27,4575	20	-1,37	0,013655635	0,007524534
hsa-miR-708-5p	29,56	20	23,93	33,82	20	20	20	20	26,8275	20	-1,32	0,1327535	0,0988878
hsa-miR-497-5p	21,93	29,43	27,35	26,86	20	20	20	20	26,3925	20	-1,31	0,037853295	0,02298236
hsa-miR-493-3p	27,66	22,36	27,35	27,85	20	20	20	20	26,305	20	-1,31	0,024428861	0,01458253
hsa-miR-409-5p	30,52	31,78	20	22,88	20	20	20	20	26,295	20	-1,29	0,142372426	0,1075057
hsa-miR-195-5p	22,89	28,84	27,35	25,86	20	20	20	20	26,235	20	-1,31	0,021169925	0,01242113
hsa-miR-130b-3p	28,61	27,07	20	20	20	20	20	20	23,92	20	-1,18	0,231072132	0,1839146
hsa-miR-421	23,84	20	20	31,83	20	20	20	20	23,9175	20	-1,17	0,290888149	0,240428
hsa-miR-433-3p	30,52	24,72	20	20	20	20	20	20	23,81	20	-1,17	0,264967932	0,2149485
hsa-miR-361-3p	30,52	20	23,93	20	20	20	20	20	23,6125	20	-1,16	0,279583763	0,2296581
hsa-miR-4532	33,38	20	20	20	20	20	20	20	23,345	20	-1,14	0,39503317	0,3910022
hsa-miR-654-3p	33,38	20	20	20	20	20	20	20	23,345	20	-1,14	0,3950332	0,3910022
hsa-miR-362-3p	20	20	20	30,83	20	20	20	20	22,7075	20	-1,11	0,39503317	0,3910022
hsa-miR-582-5p	23,84	20	26,21	20	20	20	20	20	22,5125	20	-1,12	0,2428193	0,1957421
hsa-miR-1915-3p	29,56	20	20	20	20	20	20	20	22,39	20	-1,1	0,39503317	0,3910022
hsa-miR-193b-3p	20	20	20	27,85	20	20	20	20	21,9625	20	-1,09	0,39503317	0,3910022
hsa-miR-302b-3p	20	20	20	27,85	20	20	20	20	21,9625	20	-1,09	0,39503317	0,3910022
hsa-miR-30d-5p	26,7	20	20	20	20	20	20	20	21,675	20	-1,07	0,39503317	0,3910022
hsa-miR-450b-5p	20	20	20	25,86	20	20	20	20	21,465	20	-1,07	0,39503317	0,3910022
hsa-miR-454-3p	20,98	24,72	20	20	20	20	20	20	21,425	20	-1,07	0,342951789	0,2869597
hsa-miR-410-3p	20,98	20	23,93	20	20	20	20	20	21,2275	20	-1,06	0,327861332	0,2726602
hsa-miR-1290	24,79	20	20	20	20	20	20	20	21,1975	20	-1,06	0,39503317	0,3910022
hsa-miR-128-3p	20	23,54	20	20	20	20	20	20	20,885	20	-1,04	0,39503317	0,3910022
hsa-miR-362-5p	20	20	20	22,88	20	20	20	20	20,72	20	-1,03	0,39503317	0,3910022
hsa-miR-575	20	20	20	22,88	20	20	20	20	20,72	20	-1,03	0,3950332	0,3910022
hsa-miR-664a-3p	20	20	20	22,88	20	20	20	20	20,72	20	-1,03	0,3950332	0,3910022
hsa-miR-3158-3p	20	20	22,79	20	20	20	20	20	20,6975	20	-1,03	0,39503317	0,3910022
hsa-miR-30e-5p	21,93	20	20	20	20	20	20	20	20,4825	20	-1,02	0,39503317	0,3910022
hsa-miR-301b-3p	20	20	20	21,88	20	20	20	20	20,47	20	-1,02	0,39503317	0,3910022
hsa-miR-216b-5p	20	21,78	20	20	20	20	20	20	20,445	20	-1,02	0,39503317	0,3910022
hsa-miR-329-3p	20,03	21,19	20	20	20	20	20	20	20,305	20	-1,01	0,39503317	0,3769553
hsa-miR-1285-5p	20,98	20	20	20	20	20	20	20	20,245	20	-1,01	0,39503317	0,3910022
hsa-miR-598-3p	20	20	20	20,89	20	20	20	20	20,2225	20	-1,01	0,3950332	0,3910022
hsa-miR-1306-5p	20,03	20	20	20	20	20	20	20	20,0075	20	-1	0,39503317	0,3910022
hsa-miR-514b-5p	20,03	20	20	20	20	20	20	20	20,0075	20	-1	0,39503317	0,3910022
hsa-miR-542-3p	20,03	20	20	20	20	20	20	20	20,0075	20	-1	0,39503317	0,3910022
hsa-miR-484	20	20,01	20	20	20	20	20	20	20,0025	20	-1	0,39503317	0,3910022
hsa-miR-1-3p	20	20	20	20	20	20	20	20	20	20	1	NaN	NaN
hsa-miR-1-5p	20	20	20	20	20	20	20	20	20	20	1	NaN	NaN
hsa-miR-101-3p	20	20	20	20	20	20	20	20	20	20	1	NaN	NaN
hsa-miR-103a-3p	20	20	20	20	20	20	20	20	20	20	1	NaN	NaN
hsa-miR-105-5p	20	20	20	20	20	20	20	20	20	20	1	NaN	NaN
hsa-miR-1183	20	20	20	20	20	20	20	20	20	20	1	NaN	NaN
hsa-miR-1185-1-3p	20	20	20	20	20	20	20	20	20	20	1	NaN	NaN
hsa-miR-1185-2-3p	20	20	20	20	20	20	20	20	20	20	1	NaN	NaN
hsa-miR-1193	20	20	20	20	20	20	20	20	20	20	1	NaN	NaN
hsa-miR-1197	20	20	20	20	20	20	20	20	20	20	1	NaN	NaN
hsa-miR-1202	20	20	20	20	20	20	20	20	20	20	1	NaN	NaN
hsa-miR-1203	20	20	20	20	20	20	20	20	20	20	1	NaN	NaN
hsa-miR-1205	20	20	20	20	20	20	20	20	20	20	1	NaN	NaN
hsa-miR-1206	20	20	20	20	20	20	20	20	20	20	1	NaN	NaN
hsa-miR-122-5p	20	20	20	20	20	20	20	20	20	20	1	NaN	NaN
hsa-miR-1226-3p	20	20	20	20	20	20	20	20	20	20	1	NaN	NaN
hsa-miR-1228-3p	20	20	20	20	20	20	20	20	20	20	1	NaN	NaN
hsa-miR-1233-3p	20	20	20	20	20	20	20	20	20	20	1	NaN	NaN
hsa-miR-1236-3p	20	20	20	20	20	20	20	20	20	20	1	NaN	NaN
hsa-miR-1244	20	20	20	20	20	20	20	20	20	20	1	NaN	NaN
hsa-miR-1245b-5p	20	20	20	20	20	20	20	20	20	20	1	NaN	NaN
hsa-miR-1246	20	20	20	20	20	20	20	20	20	20	1	NaN	NaN
hsa-miR-1249-3p	20	20	20	20	20	20	20	20	20	20	1	NaN	NaN
hsa-miR-1250-5p	20	20	20	20	20	20	20	20	20	20	1	NaN	NaN
hsa-miR-1255a	20	20	20	20	20	20	20	20	20	20	1	NaN	NaN
hsa-miR-1255b-5p	20	20	20	20	20	20	20	20	20	20	1	NaN	NaN
hsa-miR-1257	20	20	20	20	20	20	20	20	20	20	1	NaN	NaN
hsa-miR-1258	20	20	20	20	20	20	20	20	20	20	1	NaN	NaN
hsa-miR-125a-3p	20	20	20	20	20	20	20	20	20	20	1	NaN	NaN
hsa-miR-1260b	20	20	20	20	20	20	20	20	20	20	1	NaN	NaN
hsa-miR-1261	20	20	20	20	20	20	20	20	20	20	1	NaN	NaN
hsa-miR-1262	20	20	20	20	20	20	20	20	20	20	1	NaN	NaN
hsa-miR-1264	20	20	20	20	20	20	20	20	20	20	1	NaN	NaN
hsa-miR-1266-5p	20	20	20	20	20	20	20	20	20	20	1	NaN	NaN
hsa-miR-1268a	20	20	20	20	20	20	20	20	20	20	1	NaN	NaN
hsa-miR-1268b	20	20	20	20	20	20	20	20	20	20	1	NaN	NaN
hsa-miR-1269a	20	20	20	20	20	20	20	20	20	20	1	NaN	NaN
hsa-miR-1271-5p	20	20	20	20	20	20	20	20	20	20	1	NaN	NaN
hsa-miR-1272	20	20	20	20	20	20	20	20	20	20	1	NaN	NaN
hsa-miR-1273c	20	20	20	20	20	20	20	20	20	20	1	NaN	NaN
hsa-miR-1276	20	20	20	20	20	20	20	20	20	20	1	NaN	NaN
hsa-miR-1277-3p	20	20	20	20	20	20	20	20	20	20	1	NaN	NaN
hsa-miR-1278	20	20	20	20	20	20	20	20	20	20	1	NaN	NaN
hsa-miR-1279	20	20	20	20	20	20	20	20	20	20	1	NaN	NaN
hsa-miR-128-1-5p	20	20	20	20	20	20	20	20	20	20	1	NaN	NaN
hsa-miR-1285-3p	20	20	20	20	20	20	20	20	20	20	1	NaN	NaN
hsa-miR-1286	20	20	20	20	20	20	20	20	20	20	1	NaN	NaN
hsa-miR-1287-3p	20	20	20	20	20	20	20	20	20	20	1	NaN	NaN
hsa-miR-1287-5p	20	20	20	20	20	20	20	20	20	20	1	NaN	NaN
hsa-miR-1289	20	20	20	20	20	20	20	20	20	20	1	NaN	NaN
hsa-miR-129-2-3p	20	20	20	20	20	20	20	20	20	20	1	NaN	NaN
hsa-miR-129-5p	20	20	20	20	20	20	20	20	20	20	1	NaN	NaN
hsa-miR-1291	20	20	20	20	20	20	20	20	20	20	1	NaN	NaN
hsa-miR-1293	20	20	20	20	20	20	20	20	20	20	1	NaN	NaN
hsa-miR-1295a	20	20	20	20	20	20	20	20	20	20	1	NaN	NaN
hsa-miR-1297	20	20	20	20	20	20	20	20	20	20	1	NaN	NaN
hsa-miR-1298-5p	20	20	20	20	20	20	20	20	20	20	1	NaN	NaN
hsa-miR-1299	20	20	20	20	20	20	20	20	20	20	1	NaN	NaN
hsa-miR-1304-3p	20	20	20	20	20	20	20	20	20	20	1	NaN	NaN
hsa-miR-1304-5p	20	20	20	20	20	20	20	20	20	20	1	NaN	NaN
hsa-miR-1305	20	20	20	20	20	20	20	20	20	20	1	NaN	NaN
hsa-miR-1306-3p	20	20	20	20	20	20	20	20	20	20	1	NaN	NaN
hsa-miR-1307-3p	20	20	20	20	20	20	20	20	20	20	1	NaN	NaN
hsa-miR-1307-5p	20	20	20	20	20	20	20	20	20	20	1	NaN	NaN
hsa-miR-1322	20	20	20	20	20	20	20	20	20	20	1	NaN	NaN
hsa-miR-1323	20	20	20	20	20	20	20	20	20	20	1	NaN	NaN
hsa-miR-133a-3p	20	20	20	20	20	20	20	20	20	20	1	NaN	NaN
hsa-miR-134-3p	20	20	20	20	20	20	20	20	20	20	1	NaN	NaN
hsa-miR-138-5p	20	20	20	20	20	20	20	20	20	20	1	NaN	NaN
hsa-miR-139-3p	20	20	20	20	20	20	20	20	20	20	1	NaN	NaN
hsa-miR-139-5p	20	20	20	20	20	20	20	20	20	20	1	NaN	NaN
hsa-miR-140-3p	20	20	20	20	20	20	20	20	20	20	1	NaN	NaN
hsa-miR-141-3p	20	20	20	20	20	20	20	20	20	20	1	NaN	NaN
hsa-miR-144-3p	20	20	20	20	20	20	20	20	20	20	1	NaN	NaN
hsa-miR-1469	20	20	20	20	20	20	20	20	20	20	1	NaN	NaN
hsa-miR-146b-5p	20	20	20	20	20	20	20	20	20	20	1	NaN	NaN
hsa-miR-147a	20	20	20	20	20	20	20	20	20	20	1	NaN	NaN
hsa-miR-147b	20	20	20	20	20	20	20	20	20	20	1	NaN	NaN
hsa-miR-150-5p	20	20	20	20	20	20	20	20	20	20	1	NaN	NaN
hsa-miR-181a-2-3p	20	20	20	20	20	20	20	20	20	20	1	NaN	NaN
hsa-miR-181b-2-3p	20	20	20	20	20	20	20	20	20	20	1	NaN	NaN
hsa-miR-181c-5p	20	20	20	20	20	20	20	20	20	20	1	NaN	NaN
hsa-miR-182-3p	20	20	20	20	20	20	20	20	20	20	1	NaN	NaN
hsa-miR-1827	20	20	20	20	20	20	20	20	20	20	1	NaN	NaN
hsa-miR-183-5p	20	20	20	20	20	20	20	20	20	20	1	NaN	NaN
hsa-miR-187-3p	20	20	20	20	20	20	20	20	20	20	1	NaN	NaN
hsa-miR-188-5p	20	20	20	20	20	20	20	20	20	20	1	NaN	NaN
hsa-miR-1908-3p	20	20	20	20	20	20	20	20	20	20	1	NaN	NaN
hsa-miR-190a-3p	20	20	20	20	20	20	20	20	20	20	1	NaN	NaN
hsa-miR-190a-5p	20	20	20	20	20	20	20	20	20	20	1	NaN	NaN
hsa-miR-190b	20	20	20	20	20	20	20	20	20	20	1	NaN	NaN
hsa-miR-192-5p	20	20	20	20	20	20	20	20	20	20	1	NaN	NaN
hsa-miR-196a-3p	20	20	20	20	20	20	20	20	20	20	1	NaN	NaN
hsa-miR-197-5p	20	20	20	20	20	20	20	20	20	20	1	NaN	NaN
hsa-miR-1972	20	20	20	20	20	20	20	20	20	20	1	NaN	NaN
hsa-miR-1973	20	20	20	20	20	20	20	20	20	20	1	NaN	NaN
hsa-miR-1976	20	20	20	20	20	20	20	20	20	20	1	NaN	NaN
hsa-miR-198	20	20	20	20	20	20	20	20	20	20	1	NaN	NaN
hsa-miR-200a-3p	20	20	20	20	20	20	20	20	20	20	1	NaN	NaN
hsa-miR-200c-3p	20	20	20	20	20	20	20	20	20	20	1	NaN	NaN
hsa-miR-202-3p	20	20	20	20	20	20	20	20	20	20	1	NaN	NaN
hsa-miR-203a-3p	20	20	20	20	20	20	20	20	20	20	1	NaN	NaN
hsa-miR-203a-5p	20	20	20	20	20	20	20	20	20	20	1	NaN	NaN
hsa-miR-205-5p	20	20	20	20	20	20	20	20	20	20	1	NaN	NaN
hsa-miR-2053	20	20	20	20	20	20	20	20	20	20	1	NaN	NaN
hsa-miR-206	20	20	20	20	20	20	20	20	20	20	1	NaN	NaN
hsa-miR-208a-3p	20	20	20	20	20	20	20	20	20	20	1	NaN	NaN
hsa-miR-208b-3p	20	20	20	20	20	20	20	20	20	20	1	NaN	NaN
hsa-miR-210-3p	20	20	20	20	20	20	20	20	20	20	1	NaN	NaN
hsa-miR-210-5p	20	20	20	20	20	20	20	20	20	20	1	NaN	NaN
hsa-miR-211-5p	20	20	20	20	20	20	20	20	20	20	1	NaN	NaN
hsa-miR-2110	20	20	20	20	20	20	20	20	20	20	1	NaN	NaN
hsa-miR-2116-5p	20	20	20	20	20	20	20	20	20	20	1	NaN	NaN
hsa-miR-2117	20	20	20	20	20	20	20	20	20	20	1	NaN	NaN
hsa-miR-212-3p	20	20	20	20	20	20	20	20	20	20	1	NaN	NaN
hsa-miR-215-5p	20	20	20	20	20	20	20	20	20	20	1	NaN	NaN
hsa-miR-216a-5p	20	20	20	20	20	20	20	20	20	20	1	NaN	NaN
hsa-miR-217	20	20	20	20	20	20	20	20	20	20	1	NaN	NaN
hsa-miR-219a-1-3p	20	20	20	20	20	20	20	20	20	20	1	NaN	NaN
hsa-miR-219a-2-3p	20	20	20	20	20	20	20	20	20	20	1	NaN	NaN
hsa-miR-219a-5p	20	20	20	20	20	20	20	20	20	20	1	NaN	NaN
hsa-miR-219b-3p	20	20	20	20	20	20	20	20	20	20	1	NaN	NaN
hsa-miR-224-5p	20	20	20	20	20	20	20	20	20	20	1	NaN	NaN
hsa-miR-23c	20	20	20	20	20	20	20	20	20	20	1	NaN	NaN
hsa-miR-25-5p	20	20	20	20	20	20	20	20	20	20	1	NaN	NaN
hsa-miR-2682-5p	20	20	20	20	20	20	20	20	20	20	1	NaN	NaN
hsa-miR-296-3p	20	20	20	20	20	20	20	20	20	20	1	NaN	NaN
hsa-miR-298	20	20	20	20	20	20	20	20	20	20	1	NaN	NaN
hsa-miR-301a-5p	20	20	20	20	20	20	20	20	20	20	1	NaN	NaN
hsa-miR-301b-5p	20	20	20	20	20	20	20	20	20	20	1	NaN	NaN
hsa-miR-302a-3p	20	20	20	20	20	20	20	20	20	20	1	NaN	NaN
hsa-miR-302a-5p	20	20	20	20	20	20	20	20	20	20	1	NaN	NaN
hsa-miR-302c-3p	20	20	20	20	20	20	20	20	20	20	1	NaN	NaN
hsa-miR-302d-3p	20	20	20	20	20	20	20	20	20	20	1	NaN	NaN
hsa-miR-302e	20	20	20	20	20	20	20	20	20	20	1	NaN	NaN
hsa-miR-302f	20	20	20	20	20	20	20	20	20	20	1	NaN	NaN
hsa-miR-30a-5p	20	20	20	20	20	20	20	20	20	20	1	NaN	NaN
hsa-miR-3131	20	20	20	20	20	20	20	20	20	20	1	NaN	NaN
hsa-miR-3136-5p	20	20	20	20	20	20	20	20	20	20	1	NaN	NaN
hsa-miR-3144-3p	20	20	20	20	20	20	20	20	20	20	1	NaN	NaN
hsa-miR-3144-5p	20	20	20	20	20	20	20	20	20	20	1	NaN	NaN
hsa-miR-3147	20	20	20	20	20	20	20	20	20	20	1	NaN	NaN
hsa-miR-3150b-3p	20	20	20	20	20	20	20	20	20	20	1	NaN	NaN
hsa-miR-3161	20	20	20	20	20	20	20	20	20	20	1	NaN	NaN
hsa-miR-3164	20	20	20	20	20	20	20	20	20	20	1	NaN	NaN
hsa-miR-3168	20	20	20	20	20	20	20	20	20	20	1	NaN	NaN
hsa-miR-3180	20	20	20	20	20	20	20	20	20	20	1	NaN	NaN
hsa-miR-3180-3p	20	20	20	20	20	20	20	20	20	20	1	NaN	NaN
hsa-miR-3180-5p	20	20	20	20	20	20	20	20	20	20	1	NaN	NaN
hsa-miR-3182	20	20	20	20	20	20	20	20	20	20	1	NaN	NaN
hsa-miR-320a	20	20	20	20	20	20	20	20	20	20	1	NaN	NaN
hsa-miR-320b	20	20	20	20	20	20	20	20	20	20	1	NaN	NaN
hsa-miR-320c	20	20	20	20	20	20	20	20	20	20	1	NaN	NaN
hsa-miR-323b-3p	20	20	20	20	20	20	20	20	20	20	1	NaN	NaN
hsa-miR-324-3p	20	20	20	20	20	20	20	20	20	20	1	NaN	NaN
hsa-miR-325	20	20	20	20	20	20	20	20	20	20	1	NaN	NaN
hsa-miR-328-3p	20	20	20	20	20	20	20	20	20	20	1	NaN	NaN
hsa-miR-329-5p	20	20	20	20	20	20	20	20	20	20	1	NaN	NaN
hsa-miR-330-3p	20	20	20	20	20	20	20	20	20	20	1	NaN	NaN
hsa-miR-330-5p	20	20	20	20	20	20	20	20	20	20	1	NaN	NaN
hsa-miR-338-5p	20	20	20	20	20	20	20	20	20	20	1	NaN	NaN
hsa-miR-339-3p	20	20	20	20	20	20	20	20	20	20	1	NaN	NaN
hsa-miR-339-5p	20	20	20	20	20	20	20	20	20	20	1	NaN	NaN
hsa-miR-33a-5p	20	20	20	20	20	20	20	20	20	20	1	NaN	NaN
hsa-miR-33b-5p	20	20	20	20	20	20	20	20	20	20	1	NaN	NaN
hsa-miR-342-5p	20	20	20	20	20	20	20	20	20	20	1	NaN	NaN
hsa-miR-345-3p	20	20	20	20	20	20	20	20	20	20	1	NaN	NaN
hsa-miR-345-5p	20	20	20	20	20	20	20	20	20	20	1	NaN	NaN
hsa-miR-346	20	20	20	20	20	20	20	20	20	20	1	NaN	NaN
hsa-miR-34b-3p	20	20	20	20	20	20	20	20	20	20	1	NaN	NaN
hsa-miR-34c-3p	20	20	20	20	20	20	20	20	20	20	1	NaN	NaN
hsa-miR-34c-5p	20	20	20	20	20	20	20	20	20	20	1	NaN	NaN
hsa-miR-3613-3p	20	20	20	20	20	20	20	20	20	20	1	NaN	NaN
hsa-miR-3613-5p	20	20	20	20	20	20	20	20	20	20	1	NaN	NaN
hsa-miR-3614-5p	20	20	20	20	20	20	20	20	20	20	1	NaN	NaN
hsa-miR-363-5p	20	20	20	20	20	20	20	20	20	20	1	NaN	NaN
hsa-miR-365b-5p	20	20	20	20	20	20	20	20	20	20	1	NaN	NaN
hsa-miR-369-3p	20	20	20	20	20	20	20	20	20	20	1	NaN	NaN
hsa-miR-371a-5p	20	20	20	20	20	20	20	20	20	20	1	NaN	NaN
hsa-miR-371b-5p	20	20	20	20	20	20	20	20	20	20	1	NaN	NaN
hsa-miR-372-3p	20	20	20	20	20	20	20	20	20	20	1	NaN	NaN
hsa-miR-373-3p	20	20	20	20	20	20	20	20	20	20	1	NaN	NaN
hsa-miR-374a-3p	20	20	20	20	20	20	20	20	20	20	1	NaN	NaN
hsa-miR-374c-5p	20	20	20	20	20	20	20	20	20	20	1	NaN	NaN
hsa-miR-376a-2-5p	20	20	20	20	20	20	20	20	20	20	1	NaN	NaN
hsa-miR-378b	20	20	20	20	20	20	20	20	20	20	1	NaN	NaN
hsa-miR-378d	20	20	20	20	20	20	20	20	20	20	1	NaN	NaN
hsa-miR-378e	20	20	20	20	20	20	20	20	20	20	1	NaN	NaN
hsa-miR-378f	20	20	20	20	20	20	20	20	20	20	1	NaN	NaN
hsa-miR-378g	20	20	20	20	20	20	20	20	20	20	1	NaN	NaN
hsa-miR-378h	20	20	20	20	20	20	20	20	20	20	1	NaN	NaN
hsa-miR-378i	20	20	20	20	20	20	20	20	20	20	1	NaN	NaN
hsa-miR-380-3p	20	20	20	20	20	20	20	20	20	20	1	NaN	NaN
hsa-miR-381-5p	20	20	20	20	20	20	20	20	20	20	1	NaN	NaN
hsa-miR-3928-3p	20	20	20	20	20	20	20	20	20	20	1	NaN	NaN
hsa-miR-3934-5p	20	20	20	20	20	20	20	20	20	20	1	NaN	NaN
hsa-miR-412-3p	20	20	20	20	20	20	20	20	20	20	1	NaN	NaN
hsa-miR-425-5p	20	20	20	20	20	20	20	20	20	20	1	NaN	NaN
hsa-miR-4284	20	20	20	20	20	20	20	20	20	20	1	NaN	NaN
hsa-miR-433-5p	20	20	20	20	20	20	20	20	20	20	1	NaN	NaN
hsa-miR-4431	20	20	20	20	20	20	20	20	20	20	1	NaN	NaN
hsa-miR-4435	20	20	20	20	20	20	20	20	20	20	1	NaN	NaN
hsa-miR-4448	20	20	20	20	20	20	20	20	20	20	1	NaN	NaN
hsa-miR-4451	20	20	20	20	20	20	20	20	20	20	1	NaN	NaN
hsa-miR-4455	20	20	20	20	20	20	20	20	20	20	1	NaN	NaN
hsa-miR-4461	20	20	20	20	20	20	20	20	20	20	1	NaN	NaN
hsa-miR-448	20	20	20	20	20	20	20	20	20	20	1	NaN	NaN
hsa-miR-4485-3p	20	20	20	20	20	20	20	20	20	20	1	NaN	NaN
hsa-miR-449b-5p	20	20	20	20	20	20	20	20	20	20	1	NaN	NaN
hsa-miR-449c-5p	20	20	20	20	20	20	20	20	20	20	1	NaN	NaN
hsa-miR-450a-1-3p	20	20	20	20	20	20	20	20	20	20	1	NaN	NaN
hsa-miR-450b-3p	20	20	20	20	20	20	20	20	20	20	1	NaN	NaN
hsa-miR-451a	20	20	20	20	20	20	20	20	20	20	1	NaN	NaN
hsa-miR-4521	20	20	20	20	20	20	20	20	20	20	1	NaN	NaN
hsa-miR-4536-5p	20	20	20	20	20	20	20	20	20	20	1	NaN	NaN
hsa-miR-4647	20	20	20	20	20	20	20	20	20	20	1	NaN	NaN
hsa-miR-4707-3p	20	20	20	20	20	20	20	20	20	20	1	NaN	NaN
hsa-miR-4741	20	20	20	20	20	20	20	20	20	20	1	NaN	NaN
hsa-miR-4755-5p	20	20	20	20	20	20	20	20	20	20	1	NaN	NaN
hsa-miR-4787-5p	20	20	20	20	20	20	20	20	20	20	1	NaN	NaN
hsa-miR-483-3p	20	20	20	20	20	20	20	20	20	20	1	NaN	NaN
hsa-miR-485-5p	20	20	20	20	20	20	20	20	20	20	1	NaN	NaN
hsa-miR-486-3p	20	20	20	20	20	20	20	20	20	20	1	NaN	NaN
hsa-miR-488-3p	20	20	20	20	20	20	20	20	20	20	1	NaN	NaN
hsa-miR-489-3p	20	20	20	20	20	20	20	20	20	20	1	NaN	NaN
hsa-miR-490-3p	20	20	20	20	20	20	20	20	20	20	1	NaN	NaN
hsa-miR-491-3p	20	20	20	20	20	20	20	20	20	20	1	NaN	NaN
hsa-miR-491-5p	20	20	20	20	20	20	20	20	20	20	1	NaN	NaN
hsa-miR-494-3p	20	20	20	20	20	20	20	20	20	20	1	NaN	NaN
hsa-miR-495-5p	20	20	20	20	20	20	20	20	20	20	1	NaN	NaN
hsa-miR-496	20	20	20	20	20	20	20	20	20	20	1	NaN	NaN
hsa-miR-499a-3p	20	20	20	20	20	20	20	20	20	20	1	NaN	NaN
hsa-miR-499a-5p	20	20	20	20	20	20	20	20	20	20	1	NaN	NaN
hsa-miR-499b-3p	20	20	20	20	20	20	20	20	20	20	1	NaN	NaN
hsa-miR-499b-5p	20	20	20	20	20	20	20	20	20	20	1	NaN	NaN
hsa-miR-500a-5p+hsa-miR-501-5p	20	20	20	20	20	20	20	20	20	20	1	NaN	NaN
hsa-miR-501-3p	20	20	20	20	20	20	20	20	20	20	1	NaN	NaN
hsa-miR-502-3p	20	20	20	20	20	20	20	20	20	20	1	NaN	NaN
hsa-miR-502-5p	20	20	20	20	20	20	20	20	20	20	1	NaN	NaN
hsa-miR-503-3p	20	20	20	20	20	20	20	20	20	20	1	NaN	NaN
hsa-miR-504-5p	20	20	20	20	20	20	20	20	20	20	1	NaN	NaN
hsa-miR-505-3p	20	20	20	20	20	20	20	20	20	20	1	NaN	NaN
hsa-miR-506-3p	20	20	20	20	20	20	20	20	20	20	1	NaN	NaN
hsa-miR-508-3p	20	20	20	20	20	20	20	20	20	20	1	NaN	NaN
hsa-miR-508-5p	20	20	20	20	20	20	20	20	20	20	1	NaN	NaN
hsa-miR-509-3-5p	20	20	20	20	20	20	20	20	20	20	1	NaN	NaN
hsa-miR-509-3p	20	20	20	20	20	20	20	20	20	20	1	NaN	NaN
hsa-miR-509-5p	20	20	20	20	20	20	20	20	20	20	1	NaN	NaN
hsa-miR-511-5p	20	20	20	20	20	20	20	20	20	20	1	NaN	NaN
hsa-miR-512-3p	20	20	20	20	20	20	20	20	20	20	1	NaN	NaN
hsa-miR-512-5p	20	20	20	20	20	20	20	20	20	20	1	NaN	NaN
hsa-miR-513a-3p	20	20	20	20	20	20	20	20	20	20	1	NaN	NaN
hsa-miR-513a-5p	20	20	20	20	20	20	20	20	20	20	1	NaN	NaN
hsa-miR-513b-5p	20	20	20	20	20	20	20	20	20	20	1	NaN	NaN
hsa-miR-514a-3p	20	20	20	20	20	20	20	20	20	20	1	NaN	NaN
hsa-miR-515-3p	20	20	20	20	20	20	20	20	20	20	1	NaN	NaN
hsa-miR-515-5p	20	20	20	20	20	20	20	20	20	20	1	NaN	NaN
hsa-miR-516a-3p+hsa-miR-516b-3p	20	20	20	20	20	20	20	20	20	20	1	NaN	NaN
hsa-miR-517a-3p	20	20	20	20	20	20	20	20	20	20	1	NaN	NaN
hsa-miR-517c-3p+hsa-miR-519a-3p	20	20	20	20	20	20	20	20	20	20	1	NaN	NaN
hsa-miR-518b	20	20	20	20	20	20	20	20	20	20	1	NaN	NaN
hsa-miR-518c-3p	20	20	20	20	20	20	20	20	20	20	1	NaN	NaN
hsa-miR-518f-3p	20	20	20	20	20	20	20	20	20	20	1	NaN	NaN
hsa-miR-5196-5p	20	20	20	20	20	20	20	20	20	20	1	NaN	NaN
hsa-miR-519b-5p+hsa-miR-519c-5p+hsa-miR-523-5p+hsa-miR-518e-5p+hsa-miR-522-5p+hsa-miR-519a-5p	20	20	20	20	20	20	20	20	20	20	1	NaN	NaN
hsa-miR-519c-3p	20	20	20	20	20	20	20	20	20	20	1	NaN	NaN
hsa-miR-519d-3p	20	20	20	20	20	20	20	20	20	20	1	NaN	NaN
hsa-miR-520a-3p	20	20	20	20	20	20	20	20	20	20	1	NaN	NaN
hsa-miR-520a-5p	20	20	20	20	20	20	20	20	20	20	1	NaN	NaN
hsa-miR-520c-3p	20	20	20	20	20	20	20	20	20	20	1	NaN	NaN
hsa-miR-520d-3p	20	20	20	20	20	20	20	20	20	20	1	NaN	NaN
hsa-miR-520d-5p+hsa-miR-527+hsa-miR-518a-5p	20	20	20	20	20	20	20	20	20	20	1	NaN	NaN
hsa-miR-520g-3p	20	20	20	20	20	20	20	20	20	20	1	NaN	NaN
hsa-miR-520h	20	20	20	20	20	20	20	20	20	20	1	NaN	NaN
hsa-miR-522-3p	20	20	20	20	20	20	20	20	20	20	1	NaN	NaN
hsa-miR-525-3p	20	20	20	20	20	20	20	20	20	20	1	NaN	NaN
hsa-miR-525-5p	20	20	20	20	20	20	20	20	20	20	1	NaN	NaN
hsa-miR-526a+hsa-miR-518c-5p+hsa-miR-518d-5p	20	20	20	20	20	20	20	20	20	20	1	NaN	NaN
hsa-miR-532-3p	20	20	20	20	20	20	20	20	20	20	1	NaN	NaN
hsa-miR-532-5p	20	20	20	20	20	20	20	20	20	20	1	NaN	NaN
hsa-miR-539-5p	20	20	20	20	20	20	20	20	20	20	1	NaN	NaN
hsa-miR-541-3p	20	20	20	20	20	20	20	20	20	20	1	NaN	NaN
hsa-miR-542-5p	20	20	20	20	20	20	20	20	20	20	1	NaN	NaN
hsa-miR-544a	20	20	20	20	20	20	20	20	20	20	1	NaN	NaN
hsa-miR-548a-5p	20	20	20	20	20	20	20	20	20	20	1	NaN	NaN
hsa-miR-548aa+hsa-miR-548t-3p	20	20	20	20	20	20	20	20	20	20	1	NaN	NaN
hsa-miR-548ah-5p	20	20	20	20	20	20	20	20	20	20	1	NaN	NaN
hsa-miR-548ai+hsa-miR-570-5p	20	20	20	20	20	20	20	20	20	20	1	NaN	NaN
hsa-miR-548ak	20	20	20	20	20	20	20	20	20	20	1	NaN	NaN
hsa-miR-548al	20	20	20	20	20	20	20	20	20	20	1	NaN	NaN
hsa-miR-548ar-3p	20	20	20	20	20	20	20	20	20	20	1	NaN	NaN
hsa-miR-548b-3p	20	20	20	20	20	20	20	20	20	20	1	NaN	NaN
hsa-miR-548d-3p	20	20	20	20	20	20	20	20	20	20	1	NaN	NaN
hsa-miR-548d-5p	20	20	20	20	20	20	20	20	20	20	1	NaN	NaN
hsa-miR-548e-3p	20	20	20	20	20	20	20	20	20	20	1	NaN	NaN
hsa-miR-548e-5p	20	20	20	20	20	20	20	20	20	20	1	NaN	NaN
hsa-miR-548g-3p	20	20	20	20	20	20	20	20	20	20	1	NaN	NaN
hsa-miR-548i	20	20	20	20	20	20	20	20	20	20	1	NaN	NaN
hsa-miR-548j-3p	20	20	20	20	20	20	20	20	20	20	1	NaN	NaN
hsa-miR-548j-5p	20	20	20	20	20	20	20	20	20	20	1	NaN	NaN
hsa-miR-548k	20	20	20	20	20	20	20	20	20	20	1	NaN	NaN
hsa-miR-548n	20	20	20	20	20	20	20	20	20	20	1	NaN	NaN
hsa-miR-548v	20	20	20	20	20	20	20	20	20	20	1	NaN	NaN
hsa-miR-548y	20	20	20	20	20	20	20	20	20	20	1	NaN	NaN
hsa-miR-548z+hsa-miR-548h-3p	20	20	20	20	20	20	20	20	20	20	1	NaN	NaN
hsa-miR-551a	20	20	20	20	20	20	20	20	20	20	1	NaN	NaN
hsa-miR-551b-3p	20	20	20	20	20	20	20	20	20	20	1	NaN	NaN
hsa-miR-552-3p	20	20	20	20	20	20	20	20	20	20	1	NaN	NaN
hsa-miR-555	20	20	20	20	20	20	20	20	20	20	1	NaN	NaN
hsa-miR-556-3p	20	20	20	20	20	20	20	20	20	20	1	NaN	NaN
hsa-miR-556-5p	20	20	20	20	20	20	20	20	20	20	1	NaN	NaN
hsa-miR-561-5p	20	20	20	20	20	20	20	20	20	20	1	NaN	NaN
hsa-miR-563	20	20	20	20	20	20	20	20	20	20	1	NaN	NaN
hsa-miR-564	20	20	20	20	20	20	20	20	20	20	1	NaN	NaN
hsa-miR-567	20	20	20	20	20	20	20	20	20	20	1	NaN	NaN
hsa-miR-570-3p	20	20	20	20	20	20	20	20	20	20	1	NaN	NaN
hsa-miR-571	20	20	20	20	20	20	20	20	20	20	1	NaN	NaN
hsa-miR-573	20	20	20	20	20	20	20	20	20	20	1	NaN	NaN
hsa-miR-576-5p	20	20	20	20	20	20	20	20	20	20	1	NaN	NaN
hsa-miR-577	20	20	20	20	20	20	20	20	20	20	1	NaN	NaN
hsa-miR-579-5p	20	20	20	20	20	20	20	20	20	20	1	NaN	NaN
hsa-miR-584-3p	20	20	20	20	20	20	20	20	20	20	1	NaN	NaN
hsa-miR-584-5p	20	20	20	20	20	20	20	20	20	20	1	NaN	NaN
hsa-miR-585-3p	20	20	20	20	20	20	20	20	20	20	1	NaN	NaN
hsa-miR-587	20	20	20	20	20	20	20	20	20	20	1	NaN	NaN
hsa-miR-589-5p	20	20	20	20	20	20	20	20	20	20	1	NaN	NaN
hsa-miR-591	20	20	20	20	20	20	20	20	20	20	1	NaN	NaN
hsa-miR-592	20	20	20	20	20	20	20	20	20	20	1	NaN	NaN
hsa-miR-595	20	20	20	20	20	20	20	20	20	20	1	NaN	NaN
hsa-miR-596	20	20	20	20	20	20	20	20	20	20	1	NaN	NaN
hsa-miR-597-5p	20	20	20	20	20	20	20	20	20	20	1	NaN	NaN
hsa-miR-600	20	20	20	20	20	20	20	20	20	20	1	NaN	NaN
hsa-miR-601	20	20	20	20	20	20	20	20	20	20	1	NaN	NaN
hsa-miR-603	20	20	20	20	20	20	20	20	20	20	1	NaN	NaN
hsa-miR-604	20	20	20	20	20	20	20	20	20	20	1	NaN	NaN
hsa-miR-605-5p	20	20	20	20	20	20	20	20	20	20	1	NaN	NaN
hsa-miR-607	20	20	20	20	20	20	20	20	20	20	1	NaN	NaN
hsa-miR-608	20	20	20	20	20	20	20	20	20	20	1	NaN	NaN
hsa-miR-610	20	20	20	20	20	20	20	20	20	20	1	NaN	NaN
hsa-miR-612	20	20	20	20	20	20	20	20	20	20	1	NaN	NaN
hsa-miR-615-3p	20	20	20	20	20	20	20	20	20	20	1	NaN	NaN
hsa-miR-616-3p	20	20	20	20	20	20	20	20	20	20	1	NaN	NaN
hsa-miR-617	20	20	20	20	20	20	20	20	20	20	1	NaN	NaN
hsa-miR-620	20	20	20	20	20	20	20	20	20	20	1	NaN	NaN
hsa-miR-624-3p	20	20	20	20	20	20	20	20	20	20	1	NaN	NaN
hsa-miR-625-5p	20	20	20	20	20	20	20	20	20	20	1	NaN	NaN
hsa-miR-626	20	20	20	20	20	20	20	20	20	20	1	NaN	NaN
hsa-miR-627-3p	20	20	20	20	20	20	20	20	20	20	1	NaN	NaN
hsa-miR-628-3p	20	20	20	20	20	20	20	20	20	20	1	NaN	NaN
hsa-miR-629-5p	20	20	20	20	20	20	20	20	20	20	1	NaN	NaN
hsa-miR-631	20	20	20	20	20	20	20	20	20	20	1	NaN	NaN
hsa-miR-638	20	20	20	20	20	20	20	20	20	20	1	NaN	NaN
hsa-miR-640	20	20	20	20	20	20	20	20	20	20	1	NaN	NaN
hsa-miR-642a-3p	20	20	20	20	20	20	20	20	20	20	1	NaN	NaN
hsa-miR-651-5p	20	20	20	20	20	20	20	20	20	20	1	NaN	NaN
hsa-miR-654-5p	20	20	20	20	20	20	20	20	20	20	1	NaN	NaN
hsa-miR-660-3p	20	20	20	20	20	20	20	20	20	20	1	NaN	NaN
hsa-miR-661	20	20	20	20	20	20	20	20	20	20	1	NaN	NaN
hsa-miR-664b-3p	20	20	20	20	20	20	20	20	20	20	1	NaN	NaN
hsa-miR-665	20	20	20	20	20	20	20	20	20	20	1	NaN	NaN
hsa-miR-671-3p	20	20	20	20	20	20	20	20	20	20	1	NaN	NaN
hsa-miR-671-5p	20	20	20	20	20	20	20	20	20	20	1	NaN	NaN
hsa-miR-6724-5p	20	20	20	20	20	20	20	20	20	20	1	NaN	NaN
hsa-miR-675-5p	20	20	20	20	20	20	20	20	20	20	1	NaN	NaN
hsa-miR-744-5p	20	20	20	20	20	20	20	20	20	20	1	NaN	NaN
hsa-miR-761	20	20	20	20	20	20	20	20	20	20	1	NaN	NaN
hsa-miR-764	20	20	20	20	20	20	20	20	20	20	1	NaN	NaN
hsa-miR-765	20	20	20	20	20	20	20	20	20	20	1	NaN	NaN
hsa-miR-766-3p	20	20	20	20	20	20	20	20	20	20	1	NaN	NaN
hsa-miR-767-5p	20	20	20	20	20	20	20	20	20	20	1	NaN	NaN
hsa-miR-770-5p	20	20	20	20	20	20	20	20	20	20	1	NaN	NaN
hsa-miR-873-3p	20	20	20	20	20	20	20	20	20	20	1	NaN	NaN
hsa-miR-873-5p	20	20	20	20	20	20	20	20	20	20	1	NaN	NaN
hsa-miR-874-3p	20	20	20	20	20	20	20	20	20	20	1	NaN	NaN
hsa-miR-874-5p	20	20	20	20	20	20	20	20	20	20	1	NaN	NaN
hsa-miR-876-3p	20	20	20	20	20	20	20	20	20	20	1	NaN	NaN
hsa-miR-877-5p	20	20	20	20	20	20	20	20	20	20	1	NaN	NaN
hsa-miR-885-3p	20	20	20	20	20	20	20	20	20	20	1	NaN	NaN
hsa-miR-888-5p	20	20	20	20	20	20	20	20	20	20	1	NaN	NaN
hsa-miR-890	20	20	20	20	20	20	20	20	20	20	1	NaN	NaN
hsa-miR-891a-5p	20	20	20	20	20	20	20	20	20	20	1	NaN	NaN
hsa-miR-891b	20	20	20	20	20	20	20	20	20	20	1	NaN	NaN
hsa-miR-892a	20	20	20	20	20	20	20	20	20	20	1	NaN	NaN
hsa-miR-922	20	20	20	20	20	20	20	20	20	20	1	NaN	NaN
hsa-miR-934	20	20	20	20	20	20	20	20	20	20	1	NaN	NaN
hsa-miR-936	20	20	20	20	20	20	20	20	20	20	1	NaN	NaN
hsa-miR-937-3p	20	20	20	20	20	20	20	20	20	20	1	NaN	NaN
hsa-miR-939-5p	20	20	20	20	20	20	20	20	20	20	1	NaN	NaN
hsa-miR-941	20	20	20	20	20	20	20	20	20	20	1	NaN	NaN
hsa-miR-942-5p	20	20	20	20	20	20	20	20	20	20	1	NaN	NaN
hsa-miR-944	20	20	20	20	20	20	20	20	20	20	1	NaN	NaN
hsa-miR-95-3p	20	20	20	20	20	20	20	20	20	20	1	NaN	NaN
hsa-miR-96-5p	20	20	20	20	20	20	20	20	20	20	1	NaN	NaN
hsa-miR-98-3p	20	20	20	20	20	20	20	20	20	20	1	NaN	NaN
